# 1 Using routine emergency department data for syndromic surveillance of 2 acute respiratory illness in Germany, week 10-2017 and 10-2021

3 **Authors:** T. Sonia Boender\*<sup>1</sup>, Wei Cai<sup>1</sup>, Madlen Schranz<sup>1,2</sup>, Theresa Kocher<sup>1,3</sup>, Birte Wagner<sup>1</sup>,  
4 Alexander Ullrich<sup>1</sup>, Silke Buda<sup>1</sup>, Rebecca Zöllner<sup>4</sup>, Felix Greiner<sup>5,6,7</sup>, Michaela Diercke<sup>1</sup>, Linus  
5 Grabenhenrich<sup>3</sup>

## 6 **Affiliations:**

- 7 1) Robert Koch Institute, Department for Infectious Disease Epidemiology, Berlin, Germany
- 8 2) Charité – Universitätsmedizin Berlin, corporate member of Freie Universität Berlin and  
9 Humboldt Universität zu Berlin, Institute of Public Health, Berlin, Germany
- 10 3) Robert Koch Institute, Department for Methodology and Research Infrastructure, Berlin,  
11 Germany
- 12 4) Health Protection Authority, Frankfurt am Main, Germany
- 13 5) Department of Trauma Surgery, Otto von Guericke University Magdeburg, Magdeburg,  
14 Germany
- 15 6) AKTIN – Emergency Department Data Registry, Magdeburg/Aachen, Germany
- 16 7) Institute for Occupational and Maritime Medicine (ZfAM), University Medical Center  
17 Hamburg-Eppendorf (UKE), Germany

18 \*Corresponding author: Dr Sonia Boender, [BoenderS@rki.de](mailto:BoenderS@rki.de)

19 **Key words (MeSH Terms):** Public Health Surveillance; COVID-19; Respiratory Tract Infections;  
20 Emergency Service, Hospital.

21 **Word count:** 246 abstract; 3,570 main body; 51 references; tables: 1 main, 2 supplementary  
22 figures: 5 main, 5 supplementary.

23 **Conflict of interest statement:** None declared.

24 **Funding:** The Robert Koch Institute is an Institute within the portfolio of the Federal Ministry of  
25 Health. This work was funded by the Innovation Committee of the Federal Joint Committee  
26 (*Innovationsfonds des Gemeinsamen Bundesausschusses, G-BA*) [ESEG project, grant number  
27 01VSF17034]. The implementation and operation of the AKTIN – Emergency Department Data  
28 Registry is funded by the Federal Ministry of Education and Research.

## 29 **Abstract**

### 30 Background

31 The Coronavirus disease 2019 (COVID-19) pandemic expanded the need for timely information  
32 on acute respiratory illness on the population level.

### 33 Aim

34 We explored the potential of routine emergency department data for syndromic surveillance of  
35 acute respiratory illness in Germany.

### 36 Methods

37 We included routine attendance data from emergency departments who continuously transferred  
38 data between week 10-2017 and 10-2021, with ICD-10 codes available for >75% of the  
39 attendances. Case definitions for acute respiratory illness (ARI), severe ARI (SARI), influenza-  
40 like illness (ILI), respiratory syncytial virus disease (RSV) and COVID-19 were based on a  
41 combination of ICD-10 codes, and/or chief complaints, sometimes combined with information on  
42 hospitalisation and age.

### 43 Results

44 We included 1,372,958 attendances from eight emergency departments. The number of  
45 attendances dropped in March 2020, increased during summer, and declined again during the  
46 resurgence of COVID-19 cases in autumn and winter of 2020/2021. A pattern of seasonality of acute  
47 respiratory infections could be observed. By using different case definitions (i.e. for ARI, SARI,  
48 ILI, RSV) both the annual influenza seasons in the years 2017-2020 and the dynamics of the  
49 COVID-19 pandemic in 2020-2021 were apparent. The absence of the 2020/2021 flu season was  
50 visible, parallel to the resurgence of COVID-19 cases. The percentage SARI among ARI cases  
51 peaked in April-May 2020 (17%) and November 2020-January 2021 (14%).

### 52 Conclusion

53 Syndromic surveillance using routine emergency department data has the potential to monitor the  
54 trends, timing, duration, magnitude and severity of illness caused by respiratory viruses, including  
55 both influenza and SARS-CoV-2.

## 56 Introduction

57 The response to the Coronavirus disease 2019 (COVID-19) pandemic expanded the need for  
58 timely information on acute respiratory illness on the population level, to trigger public health  
59 action, and support healthcare planning. Therefore, robust surveillance systems of respiratory  
60 illnesses are essential to monitor the burden of disease, and therewith inform public health to take  
61 appropriate and timely measures. The effects of the COVID-19 pandemic, as well as the  
62 associated public health and social measures to contain the spread of the virus, have affected  
63 the transmission of not only seasonal influenza, but also other respiratory viruses in Germany (1,  
64 2). These changes in the epidemiological situation affect routine surveillance systems for  
65 monitoring the epidemiology and virology of respiratory illnesses (3). Therefore, further  
66 investigation of the impact on population health, as well as the healthcare system is required.

67 As public health institutes are planning to transition from COVID-19 emergency surveillance to  
68 routine surveillance of all respiratory pathogens, syndromic surveillance of acute respiratory  
69 illness – i.e. cross-pathogen symptomatic cases – plays an important role (4). In Germany, certain  
70 syndromic surveillance systems for acute respiratory illnesses (ARI) have been implemented  
71 before the pandemic: internet-based syndromic monitoring of ARI in the general population  
72 (*GrippeWeb*, “FluWeb”)(5); sentinel surveillance of ARI consultations in primary care, including  
73 virological surveillance (Influenza Working Group(6)) and sentinel surveillance of severe acute  
74 respiratory illnesses (SARI) among hospitalised patients using ICD-10 diagnostic codes  
75 (ICOSARI)(7). In addition, defined respiratory diseases as COVID-19 and influenza are monitored  
76 through mandatory notifications by clinicians and laboratories, within the framework of the  
77 Protection against Infection Act.

78 The availability of electronically collected routine medical data, such as emergency department  
79 data, allows for an extended approach in applied epidemiology and public health surveillance (8).  
80 Syndromic surveillance using routine emergency department data can be a fast approach to  
81 report and detect changes in healthcare utilization, without creating an additional administrative  
82 burden. In the United Kingdom (9), France (10) and other countries, syndromic surveillance  
83 systems based on emergency department data have been established (11, 12), and have  
84 previously provided timely public health insight at extraordinary times such as extreme weather  
85 events (13) or mass gatherings (e.g. the Olympic Games in 2012 (14)), as well as during the  
86 COVID-19 pandemic (15).

87 Previous analyses of emergency department data in Germany successfully detected syndromes  
88 to monitor unspecific gastrointestinal infections, including their seasonal fluctuation (16), as well  
89 as a first description of ARI cases (17). Since end of June 2020, the weekly Emergency  
90 Department Situation Report presents data from the routine documentation of up to 21 selected  
91 emergency departments in Germany (18). These reports showed that in parallel to the COVID-19  
92 pandemic and the associated public health and social measures starting mid-March 2020,  
93 attendances dropped(19). Nation-wide public health and social measures commenced in  
94 February-March 2020, including a “contact ban” allowing a maximum of two people, closure of  
95 most public spaces including schools, non-essential shops, and many business (20-22). By April-  
96 May 2020, physical distancing measures were gradually eased. During the summer months of  
97 2020, emergency department attendances partially increased again (19). Large-scale testing  
98 focusing on symptomatic suspected cases, contact persons and vulnerable settings stayed in  
99 place, as well as the use of face-masks, physical distancing and a quarantine for people returning  
100 from areas classified as high-risk. During the resurgence of cases in the fall of 2020, many public  
101 health and social measures were re-implemented, including closure of most public spaces  
102 (including non-essential shops and hospitality), a working from home policy, and the call to reduce  
103 personal contacts to the bare minimum (21). By December 2020, non-essential shops and  
104 schools and were also closed. During the resurgence of COVID-19 cases and implementation of  
105 public health and social measures during the fall and winter of 2020-2021, the number of  
106 attendances decreased again to about one quarter below the 2019 average Gradual lifting of  
107 measures started from March 2021, followed by the introducing a “3G” policy for shops, sports,  
108 and hospitality (i.e. requiring proof of either a negative COVID-19 lateral flow test (*‘Getestet’*),  
109 completed course of vaccination (*‘Geimpft’*), or recent recovery (*‘Genesen’*) (21). Emergency  
110 attendances remained below 2019 average until the time of analysis and writing (April 2021) (18).

111 In this work, we aimed to describe emergency department attendances for acute respiratory  
112 illness in Germany over time, for the purpose of the development and implementation of  
113 syndromic surveillance. Findings of this study facilitated the implementation of surveillance  
114 indicators of acute respiratory illness in the weekly emergency department surveillance reports  
115 (23), and cross-pathogen syndromic surveillance of symptomatic cases of respiratory illness in  
116 Germany overall(4). Furthermore, we explore the impact of the COVID-19 pandemic, and its  
117 associated public health and social measures, on these presentations of acute respiratory illness.

118

## 119 **Methods**

### 120 Study design

121 We conducted a retrospective observational study to explore the potential of routine emergency  
122 department data for syndromic surveillance of acute respiratory illness in Germany. Following a  
123 process of data curation, quality management and exploration, and defining syndromic case  
124 definitions, we described emergency department attendances over time for the period of 6 March  
125 2017 up to and including 13 March 2021, to provide insight into presentation for acute respiratory  
126 illness.

### 127 Setting

128 Data used in this analysis was provided through two networks of German emergency departments  
129 which continuously transfer anonymized routine health data to the Robert Koch Institute (RKI,  
130 Germany's national public health institute)(24): the AKTIN – Emergency Department Data  
131 Registry (25) and the ESEG-project (*“Erkennung und Steuerung Epidemischer Gefahrenlagen”*;  
132 translation: detection and control of epidemic situations <http://www.rki.de/eseg>). Germany has  
133 over 1,000 emergency departments that differ in size and level of care  
134 (basic/extended/comprehensive emergency care) (26). There are no barriers to accessibility, as  
135 patients can be admitted by ambulance, referred by a general practitioner or even by themselves  
136 as “walk-in” patients. Emergency departments participate and share data on a voluntary basis. At  
137 the RKI, these routine health data from the different sources are merged and processed using  
138 the NoKeDa (*NotaufnahmeKernDatensatz*) data model (27), when the date of visit, age, and sex  
139 were available. Observations were recorded by visit (attendance) and not by person; multiple  
140 visits by the same person cannot be linked.

### 141 Study population

142 Emergency attendance data was exported from the RKI server on 13 April 2021, using SUMO-  
143 DB Release 3.0.3 (database population). In addition to the database release, data quality  
144 summary reports were generated, including information on completeness of attendances and  
145 variables. The data availability and quality could be assessed, based on the descriptive statistics  
146 and data visualisation of data quality summary. For the purpose of this work, a subset of  
147 emergency departments was included (study population): departments who continuously  
148 transferred attendance data (at least one admission per day) for the period of 6 March 2017 (week

149 10-2017) up to and including 13 March 2021 (week 10-2021), with ICD-10 diagnostic codes for  
150 >75% of the attendances.

### 151 Data protection and ethics

152 In AKTIN and ESEG, individual patient consent is not provided for the context of the emergency  
153 situation and the technical and organizational measures provided. The AKTIN-register received  
154 medical ethical approval from the Ethics Committee of the Otto von Guericke University  
155 Magdeburg, Medical Faculty (160/15) (28). The AKTIN scientific board approved regular/daily  
156 data query and transmission to RKI (Project-ID 2019-003). Due to the anonymized nature of the  
157 data, an ethical approval was not necessary for ESEG data, as disclosed by the ethics committee  
158 of the physician's chamber Hesse. The data were transferred anonymously. The data model uses  
159 a minimal set of data points, or categorisation of specific data elements (e.g. age in years and  
160 groups, instead of date of birth), which ensures personal data protection, and defines an approved  
161 list of variables. The data protection officer of the RKI has approved the use of anonymized case-  
162 based emergency department data using the NoKeDa model for research purposes (BDS/ISB,  
163 09-01-2019).

### 164 Variables

165 The following variables were included for analysis: emergency department/hospital, age  
166 (collected in age-groups: 0-2 years, 3-4 years, followed by 5-year groups, and 80+ years), sex  
167 (male/female/other), triage (codes 1 to 5, higher code meaning less urgent), diagnosis (ICD-10  
168 codes, when labelled confirmed/suspected), chief complaints (according to the Canadian  
169 Emergency Department Information System – Presenting Complaint List [CEDIS-PCL](29) or  
170 Manchester Triage System [MTS] (30)), referral, mode of transport, disposition (e.g. hospital  
171 admission) and isolation. Potential missing data refers to the absence of documentation; all data  
172 are based on routine emergency care at the respective sites, based on routine documentation  
173 practices.

### 174 Case definitions

175 We defined a set of case definitions in agreement with the established syndromic surveillance  
176 systems of acute respiratory infections at RKI and based on (inter)national standards (31, 32).  
177 Case definitions were based on a combination of ICD-10 diagnostic codes, or chief complaints,  
178 sometimes combined with disposition and age. Case criteria and case classifications (i.e.  
179 probable, confirmed) for acute respiratory illness (ARI), severe acute respiratory illness (SARI),

180 influenza-like illness (ILI), respiratory syncytial virus (RSV) and Coronavirus disease 2019  
181 (COVID-19) are summarised in **Supplemental Table 1**. Combined case definitions were used for  
182 the primary analysis; i.e. cases of ILI, RSV and COVID-19 were either probable and/or confirmed.

### 183 Statistical analysis

184 Attendances and cases were analysed as aggregated counts by week. Weekly numbers of all  
185 cases that met the case definitions (see above and **Supplemental Table 1**) were plotted as  
186 absolute counts, as well as number of cases per 1,000 attendances to adjust for fluctuations in  
187 attendances (i.e. a change in the denominator) over time. Cases of ARI and SARI were explored  
188 as individual indicators, as well as through calculating the percentage of severe cases among ARI  
189 cases (SARI/ARI). Probable and confirmed cases of ILI, RSV-Disease and COVID-19 were  
190 explored as separate and combined overall case numbers (probable + confirmed cases).

191 The number of weekly attendances were described and summarised for the period before and  
192 during the COVID-19 pandemic (2 March 2020, week 10/2020). These different phases of the  
193 COVID-19 pandemic in Germany have been categorised following Schilling et. al (33): 0) pre-  
194 pandemic and sporadic cases up to and including week 09/2020, 1) first COVID-19 wave week  
195 10/2020-20-2020; 2) summer plateau week 21/2020-39/2020; 3) second COVID-19 wave week  
196 40/2020-10/2021. Because the number of weekly attendances were not normally distributed,  
197 Wilcoxon rank sum test was used for simple comparisons of the distribution of weekly cases per  
198 1,000 attendances before and during the pandemic. Next, time series were decomposed to  
199 visually investigate the seasonality and trend over time; a decomposition of the COVID-19 time  
200 series of one year was not possible because the series was too short (less than two periods).

201 Data were analysed using R statistical software, using the *tidyverse*, *xts* and *zoo* packages (34).  
202 The aggregated data of the attendances and cases (ARI, SARI, ILI, RSV, COVID-19) by week  
203 used for the analysis, are provided in the **Supplemental Material**.

204

## 205 **Results**

206 Consequently, the study population included data of 1,372,958 attendances between 6 March  
207 2017 (week 10-2017) up to and including 13 March 2021 (week 10-2021) from eight emergency  
208 departments (**Table 1**). The included departments provided comprehensive (5 departments) and

209 extended (3 departments) emergency care in seven federal states of Germany (Baden-  
 210 Württemberg, Bavaria, Berlin, Brandenburg, Hesse, Lower Saxony, Saxony).

211 **Table 1. Summary of total emergency department attendances, between 6 March 2017**  
 212 **(week 10-2017) up to and including 13 March 2021 (week 10-2021), for the full observation**  
 213 **period, and stratified for the time before and during the COVID-19 pandemic.**  
 214

| Period (weeks)                                | 10/2017 -<br>09/2020 |      | 10/2020 -<br>10/2021 |      | Total       |      |
|-----------------------------------------------|----------------------|------|----------------------|------|-------------|------|
| <b>Attendances</b>                            | N=1,082,850          |      | N=290,108            |      | N=1,372,958 |      |
| <b>Age (in years)</b>                         | N                    | %    | N                    | %    | N           | %    |
| 0-2                                           | 56,356               | 5.2  | 18,682               | 6.4  | 75,038      | 5.5  |
| 3-4                                           | 40,817               | 3.8  | 7,209                | 2.5  | 48,026      | 3.5  |
| 5-9                                           | 56,330               | 5.2  | 11,479               | 4.0  | 67,809      | 4.9  |
| 10-14                                         | 43,080               | 4.0  | 9,383                | 3.2  | 52,463      | 3.8  |
| 15-19                                         | 49,574               | 4.0  | 11,580               | 4.0  | 61,154      | 4.5  |
| 20-39                                         | 183,765              | 17.0 | 47,380               | 16.3 | 231,145     | 16.8 |
| 40-59                                         | 269,240              | 24.9 | 75,096               | 25.9 | 344,336     | 25.1 |
| +60-79                                        | 227,639              | 21.0 | 65,311               | 22.5 | 292,950     | 21.3 |
| 80+                                           | 156,049              | 14.4 | 43,988               | 15.2 | 200,037     | 14.6 |
| <b>Sex</b>                                    |                      |      |                      |      |             |      |
| Female                                        | 524,790              | 48.5 | 140,161              | 48.3 | 664,951     | 48.4 |
| Male                                          | 557,971              | 51.5 | 149,937              | 51.7 | 707,908     | 51.6 |
| Other                                         | 89                   | 0.0  | 10                   | 0.0  | 99          | 0.0  |
| <b>Triage</b>                                 |                      |      |                      |      |             |      |
| Immediate                                     | 11,494               | 1.1  | 3,795                | 1.3  | 15,289      | 1.1  |
| Very Urgent                                   | 140,416              | 13.0 | 42,924               | 14.8 | 183,340     | 13.4 |
| Urgent                                        | 394,089              | 36.4 | 116,371              | 40.1 | 510,460     | 37.2 |
| Standard                                      | 442,466              | 40.9 | 102,638              | 35.4 | 545,104     | 39.7 |
| Non-urgent                                    | 47,274               | 4.4  | 13,041               | 4.5  | 60,315      | 4.4  |
| Missing                                       | 47,111               | 4.4  | 11,339               | 3.9  | 58,450      | 4.3  |
| <b>Transport</b>                              |                      |      |                      |      |             |      |
| Patient transport                             | 25,134               | 2.3  | 6,289                | 2.2  | 31,423      | 2.3  |
| Ambulance                                     | 102,827              | 9.5  | 42,768               | 14.7 | 145,595     | 10.6 |
| Emergency ambulance                           | 55,512               | 5.1  | 16,889               | 5.8  | 72,401      | 5.3  |
| Helicopter                                    | 30,092               | 2.8  | 274                  | 0.1  | 30,366      | 2.2  |
| Other                                         | 170,045              | 15.7 | 65,628               | 22.6 | 235,673     | 17.2 |
| Missing                                       | 699,240              | 64.6 | 158,260              | 54.6 | 857,500     | 62.5 |
| <b>Referral</b>                               |                      |      |                      |      |             |      |
| Hospital/transfer                             | 15,561               | 1.4  | 5,022                | 1.7  | 20,583      | 1.5  |
| Ambulatory emergency service outside hospital | 16,636               | 1.5  | 4,294                | 1.5  | 20,930      | 1.5  |
| Ambulatory emergency practice within hospital | 10,196               | 0.9  | 2,354                | 0.8  | 12,550      | 0.9  |



| Period (weeks)                               | 10/2017 - 09/2020 |      | 10/2020 - 10/2021 |      | Total   |      |
|----------------------------------------------|-------------------|------|-------------------|------|---------|------|
| Not referred by physician                    | 258,764           | 23.9 | 89,385            | 30.8 | 348,149 | 25.4 |
| Other                                        | 133,834           | 12.4 | 17,805            | 6.1  | 151,639 | 11.0 |
| Emergency service                            | 191,286           | 17.7 | 65,478            | 22.6 | 256,764 | 18.7 |
| Medical practitioner                         | 54,711            | 5.1  | 16,092            | 5.5  | 70,803  | 5.2  |
| Missing                                      | 401,862           | 37.1 | 89,678            | 30.9 | 491,540 | 35.8 |
| <b>Disposition</b>                           |                   |      |                   |      |         |      |
| Death                                        | 5,788             | 0.5  | 109               | 0.0  | 5,897   | 0.4  |
| Discharge against medical advice             | 6,611             | 0.6  | 2,170             | 0.7  | 8,781   | 0.6  |
| Treatment discontinued by patient            | 2,406             | 0.2  | 589               | 0.2  | 2,995   | 0.2  |
| Discharge to home                            | 119,779           | 11.1 | 42,374            | 14.6 | 162,153 | 11.8 |
| Release for further treatment by a physician | 15,343            | 1.4  | 4,480             | 1.5  | 19,823  | 1.4  |
| No physician contact                         | 1,774             | 0.2  | 212               | 0.1  | 1,986   | 0.1  |
| Inpatient admission - operational unit       | 3,577             | 0.3  | 1,482             | 0.5  | 5,059   | 0.4  |
| Inpatient admission - monitoring unit        | 18,495            | 1.7  | 7,322             | 2.5  | 25,817  | 1.9  |
| Inpatient admission - regular ward           | 73,260            | 6.8  | 26,125            | 9.0  | 99,385  | 7.2  |
| External transfer                            | 31,770            | 2.9  | 820               | 0.3  | 32,590  | 2.4  |
| Other                                        | 42,173            | 3.9  | 75                | 0.0  | 42,248  | 3.1  |
| Missing                                      | 761,874           | 70.4 | 204,350           | 70.5 | 966,224 | 70.4 |

215

216 The general characteristics of the emergency department attendances are summarized in Table  
 217 1 (**Table 1**). The overall sex (52% female) and age (6% under 2 years, 8% 3-9 years; 8% 10-19  
 218 years; 17% 20-39 years; 25% 40-59 years; 21% 60-79 years; 15% 80+ years) distributions  
 219 remained similar over the full observation period, with the largest decrease in attendances under  
 220 those 0-19 years of age (**Supplemental Table 2 and Supplemental Figure 1**).

221 Over time, the absolute number of weekly emergency department attendances dropped during  
 222 the first and second wave of the COVID-19 pandemic in Germany (**Figure 1**). The median number  
 223 of attendances per week dropped from 6,886 (interquartile range [IQR]: 6,733 - 7,104) before the

224 pandemic (<week 10/2020), to 4,741 (IQR: 4,498 – 5,124;  $P < .001$ ), during the first COVID-19  
225 wave. Following a recovery phase approaching pre-pandemic attendance rates (median 6,133;  
226 IQR: 6,010 - 6,202;  $P < .001$ ) during the summer plateau (week 21/2020-39/2020), the weekly  
227 attendances declined again to 4,950 (IQR: 4,512-5,212;  $P < .001$ ) during the second COVID-19  
228 wave during autumn and winter of 2020/2021 (week 40/2020-10/2021). The weekly attendances  
229 differed when comparing the respective phases to the pre-pandemic period, as summarised in  
230 **Supplemental Figure 2**. The highest number of 8,412 attendances per week was counted in  
231 week 09/2018, and the lowest number of 4,096 attendances per week was counted in week  
232 12/2020.

### 233 Cases of ARI, SARI, ILI, RSV-disease and COVID-19 over time

234 During the full, four-year observation period, seasonal patterns were visible for ARI, SARI, ILI,  
235 and RSV-disease cases per week, per 1,000 attendees (**Figure 2**), as well as per absolute weekly  
236 case counts (**Supplemental Figure 2**). The decomposed time series analysis suggested  
237 seasonal factors of ARI, SARI, ILI, and RSV cases (**Figure 3**).

238 In the winter of 2020/2021, both the absolute and relative ARI case counts were lower than in  
239 previous years, and showed a downward trend (**Figure 2a and 3a**). Conversely, the trend of SARI  
240 cases remained fairly stable over time, with a small downward trend in the final months of winter  
241 (**Figure 2b and 3b**). This pattern was also visible when assessing the % of severe (i.e. SARI)  
242 among ARI cases (**Figure 4**). The % of SARI cases among ARI cases fluctuated around a median  
243 of 6.9% (IQR: 5.3-8.3), was lower in the year 2017 (median 4.7% [IQR: 3.4-6.2]), fairly stable in  
244 the years 2018 (6.6% [IQR: 5.1-8.0]) and 2019 (7.4% [IQR: 6.4-8.4]). The %SARI cases among  
245 ARI cases occasionally exceeded 10%, but was only observed in single weeks during pre-  
246 pandemic times: week 18/2017, week 30/2018, week 37/2018; week 8/2019, week 20/2019, and  
247 week 37/2019. Twice during the pandemic, the % of SARI cases among ARI cases exceeded  
248 10% for five subsequent weeks in a row: week 15/2020 to 19/2020 with a peak at week 18/2020  
249 (17.1%) and week 48/2020 to week 2/2021 with a peak at week 53/2020 (14.2%), as displayed  
250 in **Figure 4**.

251 After March 2020, the expected seasonal increases in cases of ILI and RSV cases was reduced  
252 (**Figure 2c-d and 3c-d**). In parallel, COVID-19 cases were recorded from March 2020 onwards  
253 (**Figure 5**). Visual inspection of COVID-19 cases showed two periods of increased case numbers,  
254 despite the drop of overall attendances, during April-May of 2020 and a resurgence of cases starting  
255 in October 2020, which was decreased again at the end of the observation period (March 2021).

256 Overall, 17% of COVID-19 cases were also cases of SARI (all COVID-19 cases are by definition  
257 ARI cases). Of note, weekly ILI, RSV and COVID-19 cases are plotted by probable and possible  
258 case classifications, as well as the combined case definition, in **Supplemental Figure 4**.

## 259 **Discussion**

260 This descriptive study indicates proof of principle for syndromic surveillance of acute respiratory  
261 illness in emergency departments in Germany, directly feeding into routine emergency  
262 department surveillance reporting (23). Based on a selection of eight departments by voluntary  
263 participation, a clear pattern of seasonality respiratory illness (i.e. ARI, SARI, ILI and RSV-  
264 disease) could be observed. In addition, both the annual influenza seasons in the years 2017-  
265 2020 and the dynamics of the COVID-19 pandemic in 2020-2021 were apparent. The more  
266 severe flu 2017/2018 season was visible in the emergency department data, through a higher  
267 peak of attendances due to ARI compared to the 2018/2019 and 2019/2020, which is consistent  
268 with the severity of the three influenza seasons observed in the other syndromic surveillance  
269 systems (33, 35, 36). Of note, the abrupt and early end of the 2019/2020 flu wave could be visually  
270 identified, as described based on sentinel surveillance in Germany (37), as well as in Denmark,  
271 Norway and Sweden (38). The striking absence of a flu season in 2020/2021 (1, 39), was also  
272 visible, in parallel to the resurgence of COVID-19 cases during the fall and winter in 2020/2021. In  
273 2020 and the beginning of 2021, the percentage of SARI cases among ARI cases peaked twice  
274 for five subsequent weeks in April-May 2020 and November 2020-January 2021, which was the  
275 same time the first wave and resurgence of COVID-19 cases peaked in Germany (40). The reduction  
276 in ILI and RSV cases during the pandemic period could, at least in part, be explained by the  
277 influence of public health and social measures on overall disease transmission, as observed by  
278 other surveillance systems in Germany (1, 2), and internationally (41).

279 Overall emergency department attendances dropped substantially following the start of the  
280 COVID-19 pandemic in March 2020, increased during summer, and declined again during the  
281 resurgence of the pandemic during the autumn and winter of 2020/2021. The shift in attendances  
282 required a baseline adjustment for case reporting (change in denominator), by standardising the  
283 case count per 1,000 attendances. This reduction in attendances could have been partially due  
284 to the advisories to reduce physical contact with healthcare services, and to use telephone  
285 services instead (at least before visiting), when possible. This observation fits the overall reduction  
286 in hospitalisation as reported by other German hospitals (42, 43). In addition, a reluctance to visit  
287 health care facilities due to a fear to be exposed to SARS-CoV-2 (44), could also be a reason for

288 a reduction in emergency department attendances. Similar trends were observed in emergency  
289 departments in other countries, including the UK (45) and USA (46).

290 The findings of this study should be interpreted taking the following limitations into account. First,  
291 the selected data are a convenience sample and are not representative for emergency  
292 departments in Germany as a whole. Differences on the level of individual departments, as well  
293 as differences between emergency departments, played a limited role in the analysis and  
294 interpretation. This study aimed to explore the possibility and feasibility to use these routine data  
295 for public health surveillance. In addition, structural changes at the department, including active  
296 interference with patient flows with respiratory complaints, could have affected reported  
297 attendances and case counts. To fully understand trends in the data, being it due to a change in  
298 infection dynamics, healthcare seeking behaviour, the COVID-19 pandemic and public health and  
299 social measures, or structural changes at the emergency department, more information is  
300 needed. This type of investigation is, however, beyond the scope of this work. The strength of the  
301 current approach of passive surveillance using routine documentation has its own advantages  
302 being fast (timely reporting) without creating an additional burden on the healthcare workers.  
303 Furthermore, case definitions were based on routine documentation, designed for triage and  
304 clinical documentation in the emergency department, not designed for surveillance purposes. The  
305 syndromic case definitions heavily rely on clinical presentation, and laboratory diagnosis is often  
306 not available, or not foreseen. Shortness of breath, for example, may be a cardiac symptom as  
307 well, and is not always caused by a respiratory pathogen (47). Furthermore, information on  
308 hospitalisation (disposition), a key variable for SARI cases, was not always available, leading to  
309 potential underreporting of SARI cases. In addition, ICD-10 codes for COVID-19 diagnosis were  
310 not available from the beginning of the pandemic, leading to underreporting of the true number of  
311 cases.

312 As of November 2021, the syndromic surveillance indicators based on the ARI, SARI and  
313 confirmed-ILI case definitions in this paper are included in the weekly reporting of the Emergency  
314 Department Surveillance in Germany, by the RKI (23). This updated version of the report includes  
315 a data quality table of each variable of the current week. Moving forward, the current ongoing,  
316 systematic collection, analysis, interpretation, and dissemination of emergency department data  
317 for use in public health action, needs to be evaluated, to make targeted recommendations to  
318 improve quality, efficiency, and usefulness of the system (48). Especially in the context of the  
319 COVID-19 pandemic, targeted analyses looking into the potential shifts in attendances during  
320 different phases of the pandemic are ongoing. Triangulation of data sources and formal

321 comparison with established surveillance systems, including COVID-19 case notifications (49),  
322 and other syndromic and virological surveillance systems for acute respiratory infections (5, 7),  
323 will help to address under-ascertainment, to understand changes in consultation behaviour during  
324 public health emergencies and improve interpretation of the data.

325 The COVID-19 pandemic poses a new challenge for syndromic surveillance, adding an additional  
326 respiratory pathogen to the set of illnesses under monitoring and surveillance. Syndromic  
327 surveillance in emergency departments can help provide oversight of the healthcare utilisation,  
328 independent of the pathogen, for overall public health surveillance and healthcare monitoring (50).  
329 Moving forward, increased COVID-19 vaccination roll-out and subsequent (de-escalation of)  
330 public health and social measures, will have effects on circulation of other respiratory viruses as  
331 well. In the near future, this type of almost real-time syndromic surveillance can help to timely  
332 inform public health decision making, moving forward in the next phases of the pandemic.

### 333 Conclusions

334 The current analysis of four years of emergency department data identified syndromic cases of  
335 (severe) acute respiratory illness, and could differentiate between ILI, RSV and COVID-19 cases,  
336 which should be further investigated. Clear patterns of seasonality and trends over time were  
337 identified, for all case definitions, in line with findings reported from established ARI, SARI, ILI and  
338 virological surveillance systems (51). Syndromic surveillance of ARI and SARI in the emergency  
339 department could contribute to the overall burden estimates of acute respiratory infections in the  
340 upper and lower respiratory tract, which is essential in the transition transfer from COVID-19  
341 emergency surveillance to routine surveillance of all respiratory pathogens (4). Syndromic  
342 surveillance using routine emergency department data has the potential to complement  
343 established indicator based, syndromic and virological surveillance systems used to monitor the  
344 timing, duration, magnitude and severity of epidemics caused by respiratory viruses, including  
345 RSV, influenza virus and SARS-CoV-2.

346

## 347 References

- 348 1. Oh D-Y, Buda S, Biere B, Reiche J, Schlosser F, Duwe S, et al. Trends in respiratory virus  
349 circulation following COVID-19-targeted nonharmaceutical interventions in Germany, January -  
350 September 2020: an analysis of national surveillance data. *The Lancet Regional Health - Europe*.  
351 2021;Accepted for publication.
- 352 2. Ullrich A, Schranz M, Rexroth U, Hamouda O, Schaade L, Diercke M, et al. Impact of  
353 COVID-19 pandemic and associated non-pharmaceutical interventions on other notifiable  
354 infectious diseases in Germany: an analysis of national surveillance data during week 1-2016 –  
355 week 32-2020. *The Lancet Regional Health - Europe*. 2021;Accepted for publication.
- 356 3. WHO. Interpreting influenza surveillance data in the context of the COVID-19 pandemic.  
357 Geneva: World Health Organisation; 2020 28 August 2020.
- 358 4. ECDC. COVID-19 surveillance guidance - Transition from COVID-19 emergency  
359 surveillance to routine surveillance of respiratory pathogens. Stockholm: European Centre for  
360 Disease Prevention and Control; 2021 October 2021.
- 361 5. Bayer C, Renschmidt C, an der Heiden M, Tolksdorf K, Herzhoff M, Kaersten S, et al.  
362 Internet-based syndromic monitoring of acute respiratory illness in the general population of  
363 Germany, weeks 35/2011 to 34/2012. *Euro Surveill*. 2014;19(4).
- 364 6. RKI. Bericht zur Epidemiologie der Influenza in Deutschland Saison 2018/19. Robert  
365 Koch-Institut; 2019.
- 366 7. Buda S, Tolksdorf K, Schuler E, Kuhlen R, Haas W. Establishing an ICD-10 code based  
367 SARI-surveillance in Germany - description of the system and first results from five recent  
368 influenza seasons. *BMC Public Health*. 2017;17(1):612.
- 369 8. Chiolero A, Buckeridge D. Glossary for public health surveillance in the age of data  
370 science. *J Epidemiol Community Health*. 2020;74(7):612-6.
- 371 9. PHE. Emergency Department Syndromic Surveillance System (EDSSS) Public Health  
372 England; 2021 [updated 27 January 2021. 19 August 2014;[Available from:  
373 [https://www.gov.uk/government/collections/syndromic-surveillance-systems-and-](https://www.gov.uk/government/collections/syndromic-surveillance-systems-and-analyses#emergency-department-syndromic-surveillance-system)  
374 [analyses#emergency-department-syndromic-surveillance-system](https://www.gov.uk/government/collections/syndromic-surveillance-systems-and-analyses#emergency-department-syndromic-surveillance-system).
- 375 10. France Sp. Surveillance des urgences et des décès SurSaUD®: Santé publique France;  
376 [Available from: [https://www.santepubliquefrance.fr/surveillance-syndromique-sursaud-](https://www.santepubliquefrance.fr/surveillance-syndromique-sursaud-R/bulletins-sursaud-R-sos-medecins-oscour-mortalite)  
377 [R/bulletins-sursaud-R-sos-medecins-oscour-mortalite](https://www.santepubliquefrance.fr/surveillance-syndromique-sursaud-R/bulletins-sursaud-R-sos-medecins-oscour-mortalite).
- 378 11. Hughes HE, Edeghere O, O'Brien SJ, Vivancos R, Elliot AJ. Emergency department  
379 syndromic surveillance systems: a systematic review. *BMC Public Health*. 2020;20(1):1891.
- 380 12. Triple SP. Assessment of syndromic surveillance in Europe. *Lancet*.  
381 2011;378(9806):1833-4.
- 382 13. Hughes HE, Morbey R, Hughes TC, Locker TE, Shannon T, Carmichael C, et al. Using an  
383 Emergency Department Syndromic Surveillance System to investigate the impact of extreme cold  
384 weather events. *Public Health*. 2014;128(7):628-35.
- 385 14. Elliot AJ, Hughes HE, Hughes TC, Locker TE, Shannon T, Heyworth J, et al. Establishing  
386 an emergency department syndromic surveillance system to support the London 2012 Olympic  
387 and Paralympic Games. *Emergency medicine journal : EMJ*. 2012;29(12):954-60.
- 388 15. Hughes HE, Hughes TC, Morbey R, Challen K, Oliver I, Smith GE, et al. Emergency  
389 department use during COVID-19 as described by syndromic surveillance. *Emergency medicine*  
390 *journal : EMJ*. 2020;37(10):600-4.
- 391 16. Schranz M. Syndromic surveillance using emergency department data for the monitoring  
392 of unspecific acute gastrointestinal infections. Berlin, Germany: Charité – Universitätsmedizin &  
393 Robert Koch-Institut; 2019.
- 394 17. Greiner F, Brammen D, Erdmann B, Walcher F, Ziehm D. Vergleich von akuten  
395 respiratorischen Erkrankungen (ARE) in der Notaufnahme eines Schwerpunktversorgers mit

- 396 Daten der ARE-Surveillance des Niedersächsischen Landesgesundheitsamtes zwischen 2013  
397 und 2016. Gesundheitswesen (Bundesverband der Ärzte des Öffentlichen Gesundheitsdienstes  
398 (Germany)). 2017;79(04):A57.
- 399 18. SUMO-Team. Notaufnahme-Situationsreport. Robert Koch-Institut; 2021.
- 400 19. Boender TS, Greiner F, Kocher T, Schirrmeister W, Majeed RW, Bienzeisler J, et al.  
401 Inanspruchnahme deutscher Notaufnahmen während der COVID-19-Pandemie – der  
402 Notaufnahme-Situationsreport (SitRep). Epidemiologisches Bulletin. 2020(27):3--5.
- 403 20. Wieler LH, Rexroth U, Gottschalk R. Emerging COVID-19 success story: Germany's push  
404 to maintain progress2021. Available from: <https://ourworldindata.org/covid-exemplar-germany>.
- 405 21. Gesundheit Bf. Coronavirus-Pandemie (SARS-CoV-2): Chronik bisheriger Maßnahmen  
406 und Ereignisse 2020-2022 [updated 10-02-2022. Available from:  
407 <https://www.bundesgesundheitsministerium.de/coronavirus/chronik-coronavirus.html>.
- 408 22. Schilling J, Tolksdorf K, Marquis A, Faber M, Pfoch T, Buda S, et al. Die verschiedenen  
409 Phasen der COVID-19-Pandemie in Deutschland: Eine deskriptive Analyse von Januar 2020 bis  
410 Februar 2021. Bundesgesundheitsblatt - Gesundheitsforschung - Gesundheitsschutz. 2021.
- 411 23. SUMO. Emergency Department Situation Report (SitRep) - 17-11-2021. Berlin, Germany:  
412 Robert Koch Institute; 2021.
- 413 24. Grabenhenrich L, Schranz M, Boender S, Kocher T, Esins J, Fischer M. [Real-time data  
414 from medical care settings to guide public health action]. Bundesgesundheitsblatt,  
415 Gesundheitsforschung, Gesundheitsschutz. 2021;64(4):412-7.
- 416 25. Brammen D, Greiner F, Kulla M, Otto R, Schirrmeister W, Thun S, et al. AKTIN - The  
417 German Emergency Department Data Registry - real-time data from emergency medicine :  
418 Implementation and first results from 15 emergency departments with focus on Federal Joint  
419 Committee's guidelines on acuity assessment. Medizinische Klinik, Intensivmedizin und  
420 Notfallmedizin. 2022;117(1):24-33.
- 421 26. Spitzenverband. Prognose der Krankenhäuser mit Basisnotfallstufe, erweiterter oder  
422 umfassender Notfallstufe (§ 136c Absatz 4 SGB V), Stand 16.03.2021. Spitzenverband; 2021.
- 423 27. NoKeda - Notaufnahme-Kerndatenmodell für Public-Health-Surveillance und  
424 Versorgungsforschung [Internet]. 2020. Available from: [https://art-decor.org/art-decor/decor-scenarios--aktin-  
425 ?id=&effectiveDate=&datasetId=2.16.840.1.113883.2.6.60.3.1.6&datasetEffectiveDate=2018-  
426 08-  
427 17T00%3A00%3A00&conceptId=2.16.840.1.113883.2.6.60.3.2.6.20365&conceptEffectiveDate=  
428 2019-02-02T14%3A36%3A20](https://art-decor.org/art-decor/decor-scenarios--aktin-?id=&effectiveDate=&datasetId=2.16.840.1.113883.2.6.60.3.1.6&datasetEffectiveDate=2018-08-17T00%3A00%3A00&conceptId=2.16.840.1.113883.2.6.60.3.2.6.20365&conceptEffectiveDate=2019-02-02T14%3A36%3A20).
- 429
- 430 28. Brammen D, Greiner F, Kulla M, Otto R, Schirrmeister W, Thun S, et al. Das AKTIN-  
431 Notaufnahmeregister – kontinuierlich aktuelle Daten aus der Akutmedizin. Medizinische Klinik -  
432 Intensivmedizin und Notfallmedizin. 2020.
- 433 29. Grafstein E, Bullard MJ, Warren D, Unger B, Group CNW. Revision of the Canadian  
434 Emergency Department Information System (CEDIS) Presenting Complaint List version 1.1.  
435 CJEM. 2008;10(2):151-73.
- 436 30. Christ M, Grossmann F, Winter D, Bingisser R, Platz E. Modern Triage in the Emergency  
437 Department. Dtsch Arztebl International. 2010;107(50):892-8.
- 438 31. Fitzner J, Qasmieh S, Mounts AW, Alexander B, Besselaar T, Briand S, et al. Revision of  
439 clinical case definitions: influenza-like illness and severe acute respiratory infection. Bull World  
440 Health Organ. 2018;96(2):122-8.
- 441 32. WHO. Global epidemiological surveillance standards for influenza: World Health  
442 Organisation; 2013.
- 443 33. Schilling J, Buda S, Fischer M, Goerlitz L, Grote U, Haas W, et al. Retrospektive  
444 Phaseneinteilung der COVID-19-Pandemie in Deutschland bis Februar 2021. Epidemiologisches  
445 Bulletin 2021(15):3--12.

- 446 34. Hohle M. Surveillance: An R package for the monitoring of infectious diseases.  
447 *Computation Stat.* 2007;22(4):571-82.
- 448 35. Zöllner R, Boender S, Schranz M, Grabenhenrich L, Schellein O, Loza-Mencía E, et al.  
449 ESEG - Erkennung und Steuerung Epidemischer Gefahrenlagen. Ergebnisbericht zum  
450 Innovationsfonds-Projekt 01VVSF17034 (2022). Gemeninsamer Bundesausschuss -  
451 Innovationsausschuss; 2022 Forthcoming.
- 452 36. RKI. Infektionsepidemiologische Jahrbuch meldepflichtiger Krankheiten für 2020. Robert  
453 Koch-Institut; 2021.
- 454 37. Goerlitz L, Dürrwald R, an der Heiden M, Buchholz U, Preuß U, Prahm K, et al. Erste  
455 Ergebnisse zum Verlauf der Grippewelle in der Saison 2019/20: Mit 11 Wochen vergleichsweise  
456 kürzere Dauer und eine moderate Anzahl an Influenza-bedingten Arztbesuchen.  
457 *Epidemiologisches Bulletin.* 2020;2020(16):3--6.
- 458 38. Emborg H-D, Carnahan A, Bragstad K, Trebbien R, Brytting M, Hungnes O, et al. Abrupt  
459 termination of the 2019/20 influenza season following preventive measures against COVID-19 in  
460 Denmark, Norway and Sweden. *Eurosurveillance.* 2021;26(22):2001160.
- 461 39. Adlhoch C, Mook P, Lamb F, Ferland L, Melidou A, Amato-Gauci AJ, et al. Very little  
462 influenza in the WHO European Region during the 2020/21 season, weeks 40 2020 to 8 2021.  
463 *Eurosurveillance.* 2021;26(11):2100221.
- 464 40. Coronavirus Disease 2019 (COVID-19) Weekly Situation Report from the Robert Koch  
465 Institute: Calendar week 17/2021. Robert Koch Institute.
- 466 41. Maharaj AS, Parker J, Hopkins JP, Gournis E, Bogoch, II, Rader B, et al. The effect of  
467 seasonal respiratory virus transmission on syndromic surveillance for COVID-19 in Ontario,  
468 Canada. *Lancet Infect Dis.* 2021;21(5):593-4.
- 469 42. Slagman A, Behringer W, Greiner F, Klein M, Weismann D, Erdmann B, et al. Medical  
470 Emergencies During the COVID-19 Pandemic. *Deutsches Arzteblatt international.* 2020;117(33-  
471 34):545-52.
- 472 43. Kapsner LA, Kampf MO, Seuchter SA, Gruendner J, Gulden C, Mate S, et al. Reduced  
473 Rate of Inpatient Hospital Admissions in 18 German University Hospitals During the COVID-19  
474 Lockdown. *Frontiers in Public Health.* 2021;8(1018).
- 475 44. Mantica G, Riccardi N, Terrone C, Gratarola A. Non-COVID-19 visits to emergency  
476 departments during the pandemic: the impact of fear. *Public Health.* 2020;183:40-1.
- 477 45. Wyatt S, Mohammed MA, Fisher E, McConkey R, Spilsbury P. Impact of the SARS-CoV-  
478 2 pandemic and associated lockdown measures on attendances at emergency departments in  
479 English hospitals: a retrospective database study. *The Lancet Regional Health - Europe.*  
480 2021:100034.
- 481 46. Hartnett KP, Kite-Powell A, DeVies J, Coletta MA, Boehmer TK, Adjemian J, et al. Impact  
482 of the COVID-19 Pandemic on Emergency Department Visits - United States, January 1, 2019-  
483 May 30, 2020. *MMWR Morb Mortal Wkly Rep.* 2020;69(23):699-704.
- 484 47. Mockel M, Searle J, Muller R, Slagman A, Storchmann H, Oestereich P, et al. Chief  
485 complaints in medical emergencies: do they relate to underlying disease and outcome? The  
486 Charité Emergency Medicine Study (CHARITEM). *European journal of emergency medicine :  
487 official journal of the European Society for Emergency Medicine.* 2013;20(2):103-8.
- 488 48. German RR, Lee LM, Horan JM, Milstein RL, Pertowski CA, Waller MN, et al. Updated  
489 guidelines for evaluating public health surveillance systems: recommendations from the  
490 Guidelines Working Group. *MMWR Recomm Rep.* 2001;50(RR-13):1-35; quiz CE1-7.
- 491 49. Gesetz zur Verhütung und Bekämpfung von Infektionskrankheiten beim Menschen  
492 (Infektionsschutzgesetz - IfSG), (2000).
- 493 50. Elliot AJ, Harcourt SE, Hughes HE, Loveridge P, Morbey RA, Smith S, et al. The COVID-  
494 19 pandemic: a new challenge for syndromic surveillance. *Epidemiol Infect.* 2020;148:e122.
- 495 51. Buchholz U, Buda S, Prahm K, Preuß U, Streib V, Haas W. GrippeWeb-Wochenbericht.  
496 Robert Koch-Institut; 2021. p. 4.



497 **Figures**

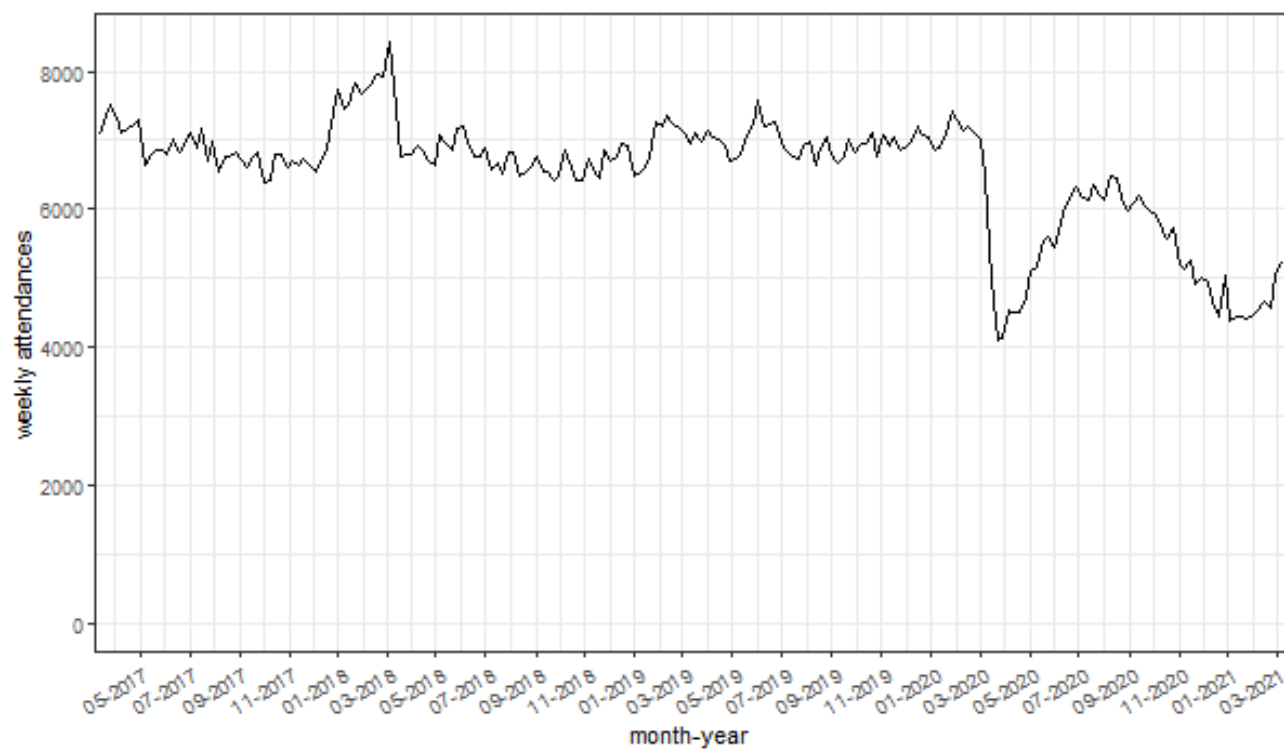

498

499 **Figure 1. Weekly emergency department attendances, between 6 March 2017 (week 10-**  
500 **2017) up to and including 13 March 2021 (week 10-**

501

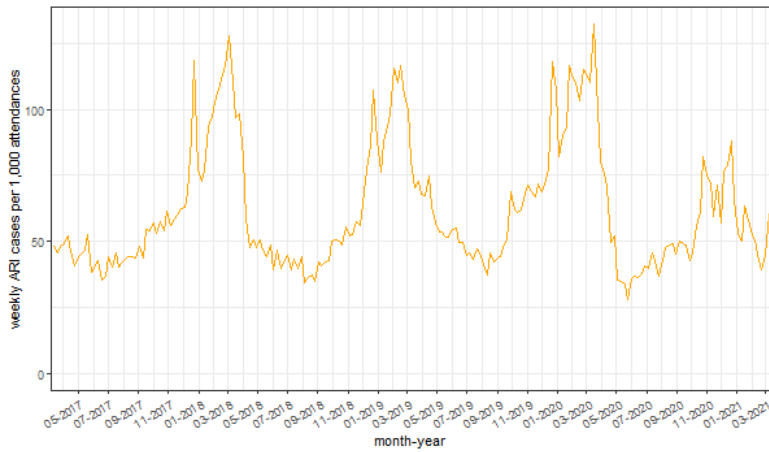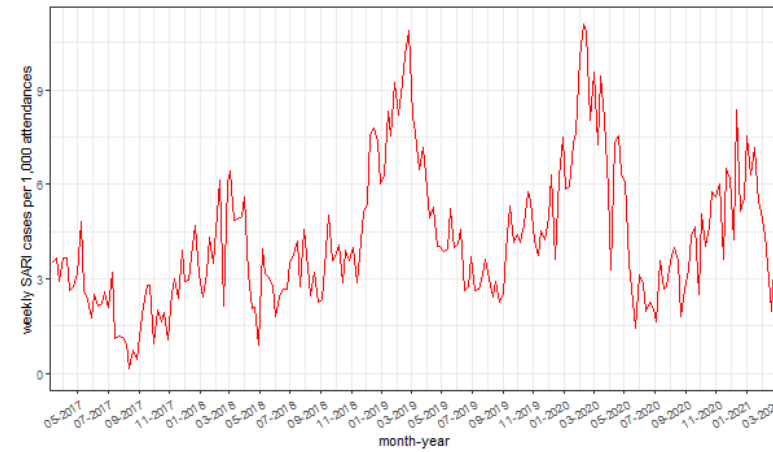

502

503 Figure 2A: acute respiratory illness (ARI)

Figure 2B: severe acute respiratory illness (SARI)

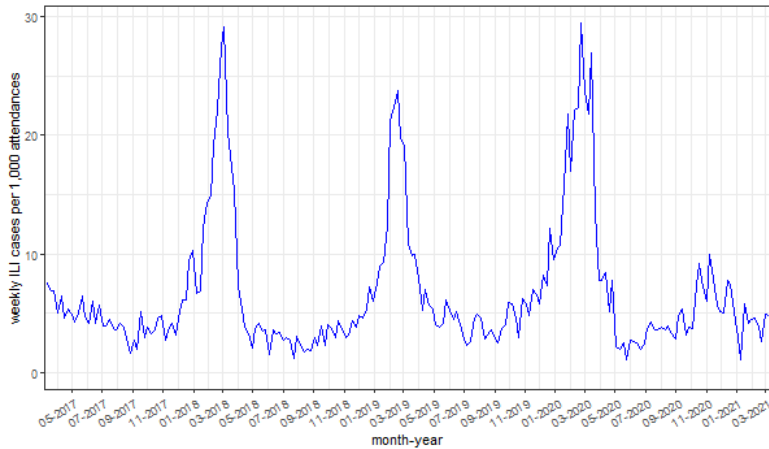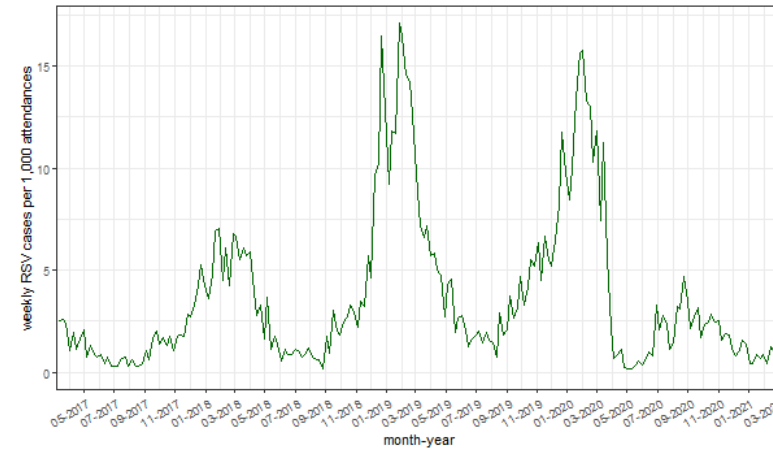

504

505 Figure 2C: influenza-like-illness (ILI)

Figure 2D: respiratory syncytial virus (RSV)

506

507 **Figure 2. Weekly case counts (ARI, SARI, ILI, RSV) per 1,000 emergency department attendances, between 6 March 2017**  
 508 **and 13 March 2021.**

509

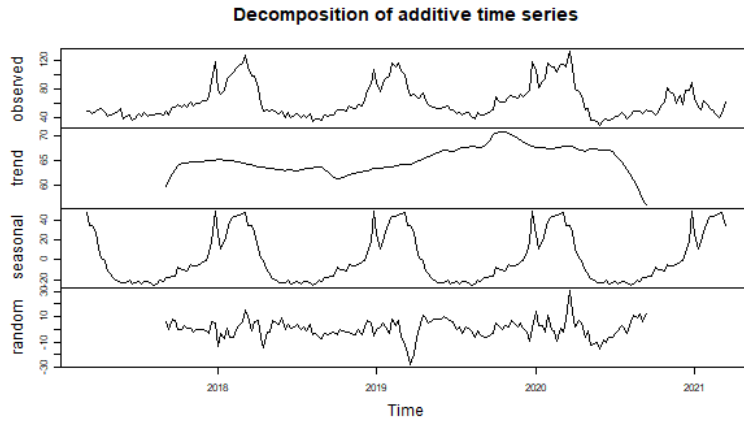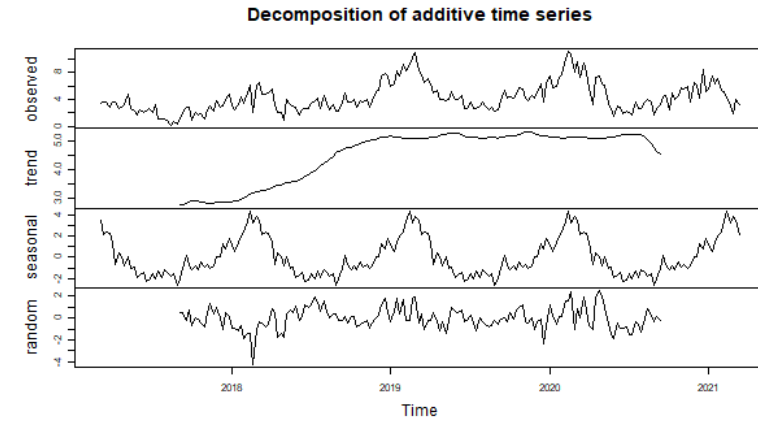

510  
511 Figure 3A: acute respiratory illness (ARI)

Figure 3B: severe of acute respiratory illness (SARI)

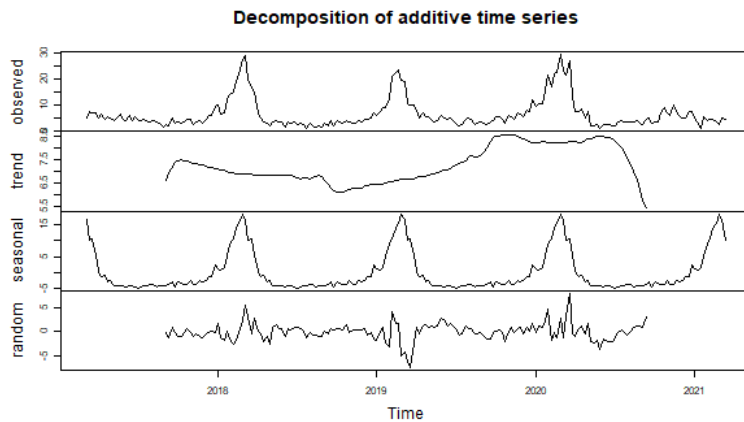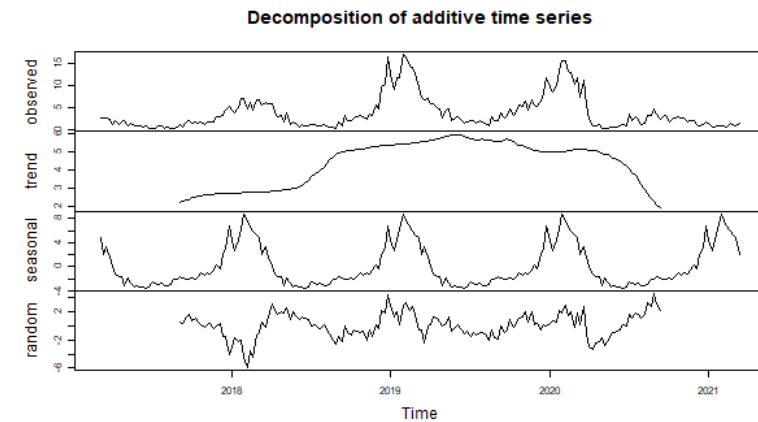

512  
513 Figure 3C: influenza-like-illness (ILI)

Figure 3D: respiratory syncytial virus (RSV)

514 **Figure 3. Decomposed time series of the weekly case counts, per 1,000 emergency department attendances, between 6**  
515 **March 2017 and 13 March 2021.**

516

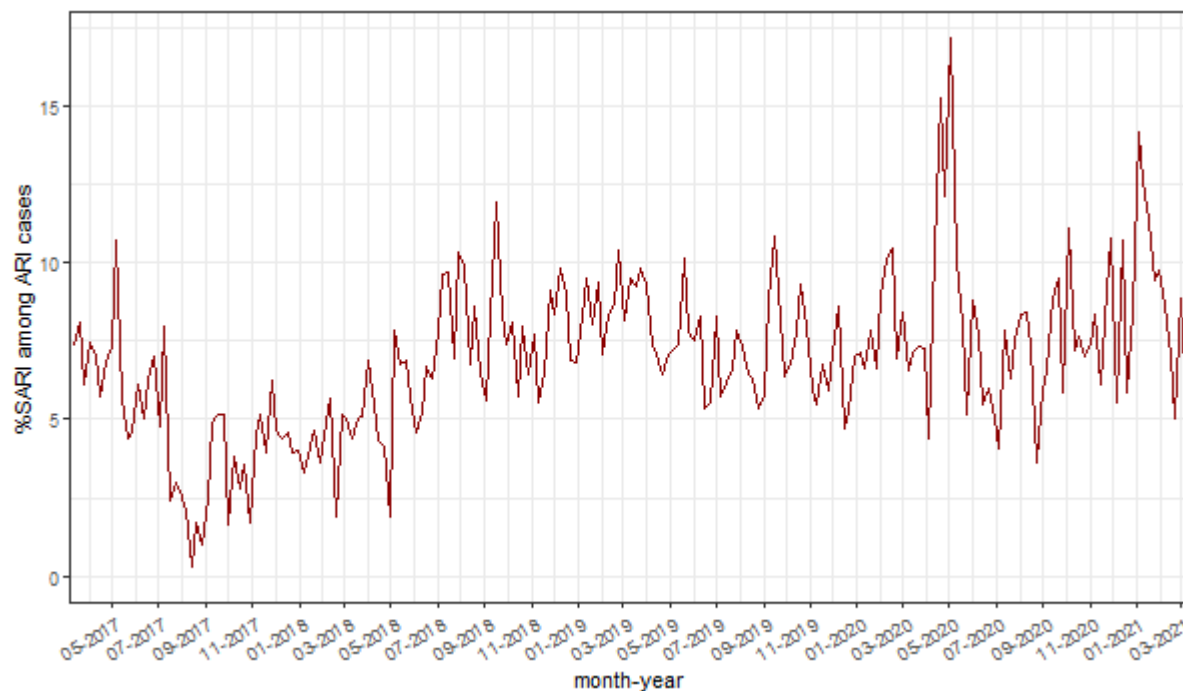

517

518 **Figure 4. Proportion (%) of severe acute respiratory illness (SARI) cases among cases of**  
519 **acute respiratory illness (ARI), between 6 March 2017 and 13 March 2021.**

520

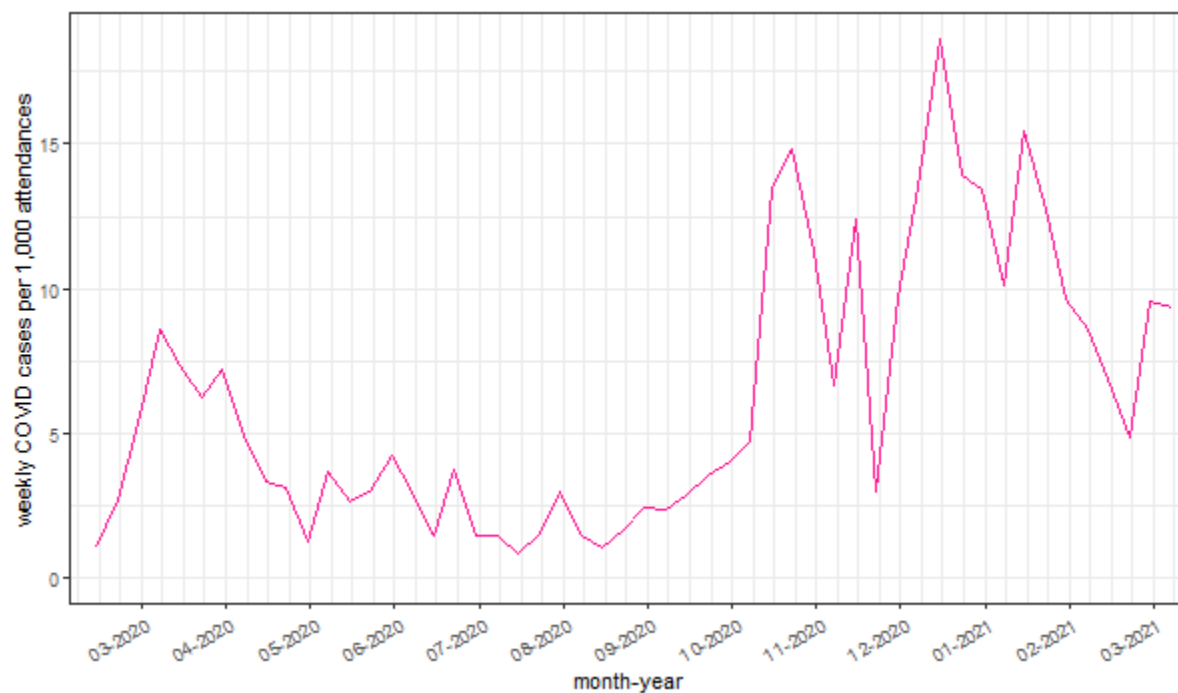

521

522 **Figure 5. Summary of COVID-19 cases per week, per 1,000 emergency department**  
523 **attendances, between 6 March 2020 and 13 March 2021.**

524
