# Supplementary material for: Using routine emergency department data for syndromic surveillance of acute respiratory illness in Germany, week 10-2017 to 10-2021
Source: bioRxiv or medRxiv preprint supplement (doi:10.1101/2021.08.19.21262303), 2022-03-14
Supplement: Supplementary file [file media-1.pdf]

**Appendices to “Using routine emergency department data for syndromic surveillance of acute respiratory illness before and during the COVID-19 pandemic in Germany, week 10-2017 and 10-2021”**

*T. Sonia Boender, Wei Cai, Madlen Schranz, Theresa Kocher, Birte Wagner, Alexander Ullrich, Silke Buda, Rebecca Zöllner, Felix Greiner, Michaela Diercke, Linus Grabenhenrich*

**Supplemental Table 1. Case definitions, and case classification (if applicable), used for syndromic surveillance based on routine emergency department data.**

| <b>Case</b>                             | <b>Definition</b>                                                                                                                                                                                                                                                                                                                                                                                                                                                                                                                                                                                                                                                                                                                                                                                                                                                                                                                                                                                                                                                                                                                                                                                                                                                          |
|-----------------------------------------|----------------------------------------------------------------------------------------------------------------------------------------------------------------------------------------------------------------------------------------------------------------------------------------------------------------------------------------------------------------------------------------------------------------------------------------------------------------------------------------------------------------------------------------------------------------------------------------------------------------------------------------------------------------------------------------------------------------------------------------------------------------------------------------------------------------------------------------------------------------------------------------------------------------------------------------------------------------------------------------------------------------------------------------------------------------------------------------------------------------------------------------------------------------------------------------------------------------------------------------------------------------------------|
| Acute respiratory illness (ARI)         | <ul style="list-style-type: none"> <li>- ICD-10 diagnostic code (any): J00-J22, J44.0, B34.9, U07.1, U07.2<br/><b>OR</b></li> <li>- Chief complaint(s):               <ul style="list-style-type: none"> <li>o [MTS: breathing problems<br/><b>AND</b><br/>(elevated temperature/fever <b>OR</b> suspected sepsis <b>OR</b> productive cough <b>OR</b> shortness of breath <b>OR</b> elevated breathing)]<br/><b>OR</b></li> <li>o [MTS: sore throat<br/><b>AND</b><br/>(elevated temperature/fever <b>OR</b> suspected sepsis <b>OR</b> special risk of infection <b>OR</b> known or suspected immunosuppression <b>OR</b> travel i.e. report on recent stay abroad <b>OR</b> special risk of infection <b>OR</b> airway at risk <b>OR</b> short of breathing <b>OR</b> light/medium/strong pain <b>OR</b> unresponsive child <b>OR</b> rapid onset <b>OR</b> shock <b>OR</b> hypersalivation <b>OR</b> stridor <b>OR</b> drowsy i.e. altered level of consciousness)]<br/><b>OR</b></li> <li>o [MTS: asthma<br/><b>AND</b><br/>(elevated temperature/fever <b>OR</b> suspected sepsis)]<br/><b>OR</b></li> <li>o [MTS: feeling unwell <b>AND</b> insufficient breathing]<br/><b>OR</b></li> <li>o [CEDIS-PCL (any): 661, 154, 653, 651, 103, 104]</li> </ul> </li> </ul> |
| Severe acute respiratory illness (SARI) | <ul style="list-style-type: none"> <li>- ICD-10 diagnostic code (any): J09-J22, U07.1, U07.2<br/><b>AND</b></li> <li>- Disposition:               <ul style="list-style-type: none"> <li>o [Inpatient admission: internal transfer, operational unit, monitoring unit, regular ward<br/><b>OR</b></li> <li>o External transfer]</li> </ul> </li> </ul>                                                                                                                                                                                                                                                                                                                                                                                                                                                                                                                                                                                                                                                                                                                                                                                                                                                                                                                     |

Supplemental Table 1. continued.

|                                     |                                                                                                                                                                                                                                                                                                                                                                                                                                                                                                                                                                                                                                                                                                                                                                                                                                                                                                                                                                                                                                                                                                                                                                                                                                                                                                                                                                                                                                                                                                                                                                                                                                                                                                                                                                                                                                                             |
|-------------------------------------|-------------------------------------------------------------------------------------------------------------------------------------------------------------------------------------------------------------------------------------------------------------------------------------------------------------------------------------------------------------------------------------------------------------------------------------------------------------------------------------------------------------------------------------------------------------------------------------------------------------------------------------------------------------------------------------------------------------------------------------------------------------------------------------------------------------------------------------------------------------------------------------------------------------------------------------------------------------------------------------------------------------------------------------------------------------------------------------------------------------------------------------------------------------------------------------------------------------------------------------------------------------------------------------------------------------------------------------------------------------------------------------------------------------------------------------------------------------------------------------------------------------------------------------------------------------------------------------------------------------------------------------------------------------------------------------------------------------------------------------------------------------------------------------------------------------------------------------------------------------|
| Influenza-like illness (ILI)        | <p>PROBABLE CASE</p> <ul style="list-style-type: none"> <li>- ICD-10 diagnostic code (any): J06.-, J12.8, J12.9, J18.-, J22</li> </ul> <p><b>OR</b></p> <ul style="list-style-type: none"> <li>- Chief complaint(s): <ul style="list-style-type: none"> <li>o [MTS: breathing problems</li> </ul> <p><b>AND</b><br/>(elevated temperature/fever <b>OR</b> suspected sepsis <b>OR</b> productive cough <b>OR</b> shortness of breath <b>OR</b> elevated breathing)]</p> <p><b>OR</b></p> <li>o [MTS: sore throat</li> </li></ul> <p><b>AND</b><br/>(elevated temperature/fever <b>OR</b> suspected sepsis <b>OR</b> special risk of infection <b>OR</b> known or suspected immunosuppression <b>OR</b> travel i.e. report on recent stay abroad <b>OR</b> special risk of infection <b>OR</b> airway at risk <b>OR</b> short of breathing <b>OR</b> light/medium/strong pain <b>OR</b> unresponsive child <b>OR</b> rapid onset <b>OR</b> shock <b>OR</b> hypersalivation <b>OR</b> stridor <b>OR</b> drowsy i.e. altered level of consciousness)]</p> <p><b>OR</b></p> <li>o [MTS: asthma</li> <p><b>AND</b><br/>(elevated temperature/fever <b>OR</b> suspected sepsis)]</p> <p><b>OR</b></p> <li>o [MTS: feeling unwell <b>AND</b> insufficient breathing]</li> <li>o [CEDIS-PCL (any): 661, 154, 653, 651, 103, 104]</li> <p><b>AND</b></p> <ul style="list-style-type: none"> <li>- Fever: <ul style="list-style-type: none"> <li>o Temperature <math>\geq 38</math> °C</li> </ul> <p><b>OR</b></p> <li>o Chief complaint: <ul style="list-style-type: none"> <li>▪ MTS: fever</li> </ul> <p><b>OR</b></p> <li>▪ CEDIS-PCL: 852</li> </li></li></ul> <p><b>OR</b></p> <li>o [ICD-10 diagnostic code (any): R50.8, R50.9]</li> <p>CONFIRMED CASE</p> <ul style="list-style-type: none"> <li>- ICD-10 diagnostic code (any): J09, J10.-, J11.-</li> </ul> |
| Respiratory syncytial virus (RSV) – | <p>PROBABLE CASE</p> <ul style="list-style-type: none"> <li>- ICD-10 diagnostic code (any): J12.8, J12.9, J18.-, J20.8, J20.9, J21.8, J21.9, J22</li> </ul> <p><b>AND</b></p> <ul style="list-style-type: none"> <li>- Age <math>\leq 2</math> years</li> </ul> <p>CONFIRMED CASE</p> <ul style="list-style-type: none"> <li>- ICD-10 diagnostic code (any): J12.1, J20.5, J21.0, B97.4</li> </ul>                                                                                                                                                                                                                                                                                                                                                                                                                                                                                                                                                                                                                                                                                                                                                                                                                                                                                                                                                                                                                                                                                                                                                                                                                                                                                                                                                                                                                                                          |
| Coronavirus disease 2019 (COVID-19) | <p>PROBABLE CASE</p> <ul style="list-style-type: none"> <li>- ICD-10 diagnostic code (any): U07.1, U07.2</li> </ul> <p>CONFIRMED CASE</p> <ul style="list-style-type: none"> <li>- ICD-10 diagnostic code: U07.1</li> </ul>                                                                                                                                                                                                                                                                                                                                                                                                                                                                                                                                                                                                                                                                                                                                                                                                                                                                                                                                                                                                                                                                                                                                                                                                                                                                                                                                                                                                                                                                                                                                                                                                                                 |

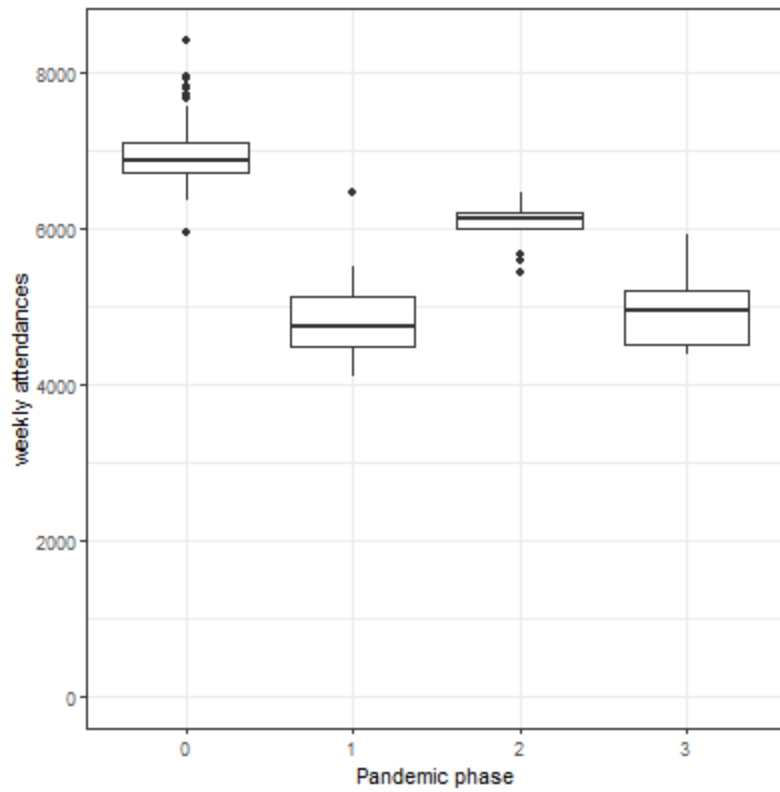

**Supplemental Figure 1. Weekly emergency department attendances, a) before and during the pandemic, broken down by subsequent pandemic phases.**  
All comparisons: Wilcoxon rank sum  $P < .001$

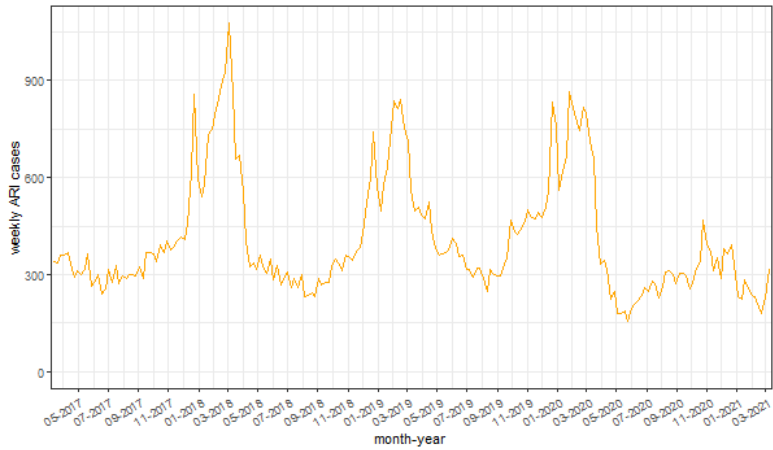

Supplemental Figure 2A

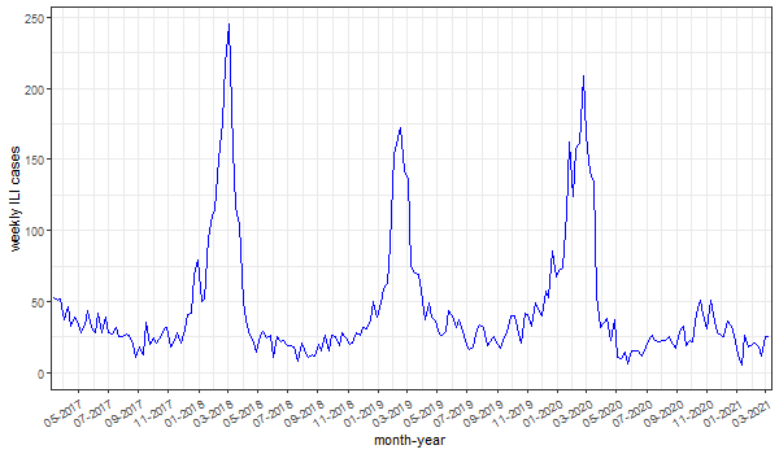

Supplemental Figure 2C

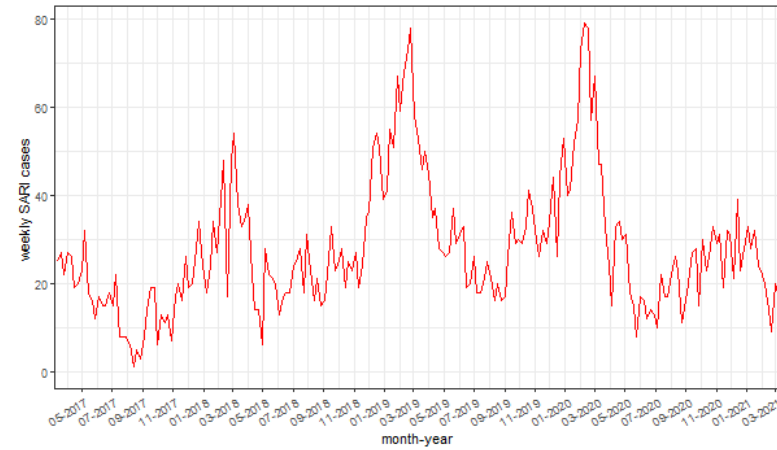

Supplemental Figure 2B

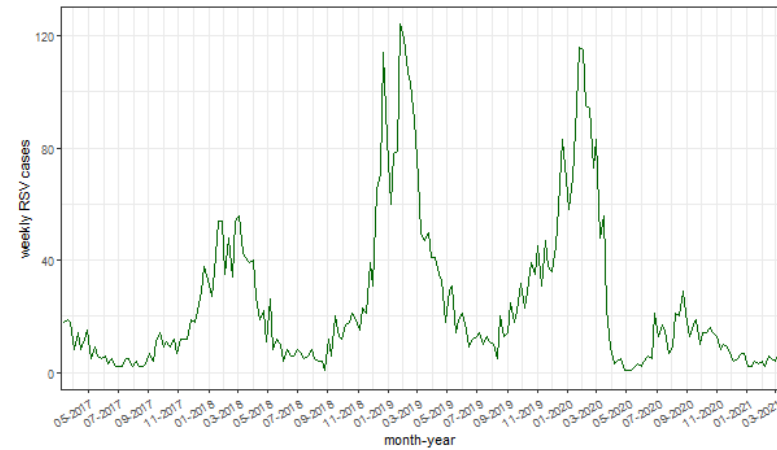

Supplemental Figure 2D

**Supplemental Figure 2. Weekly case count of acute respiratory illness (ARI; 2A), severe acute respiratory illness (SARI; 2B), influenza-like-illness (ILI; 2C), and respiratory syncytial virus (RSV; 2D), between 6 March 2017 and 13 March 2021.**

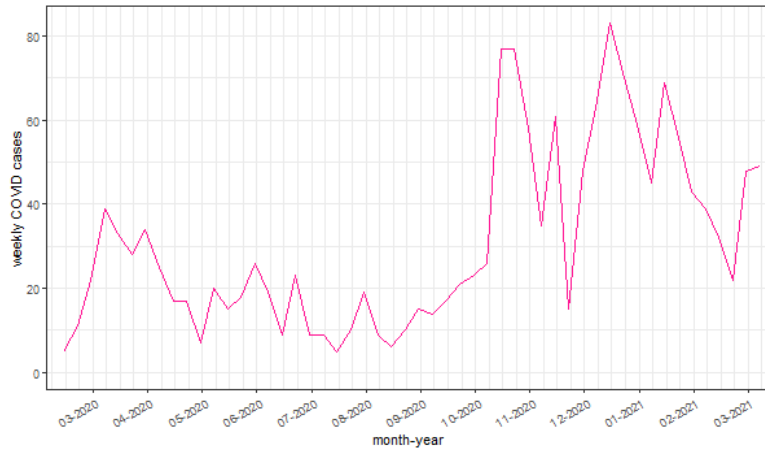

**Supplemental Figure 3 Weekly case count of COVID-19, between 6 March 2020 and including 13 March 2021.**

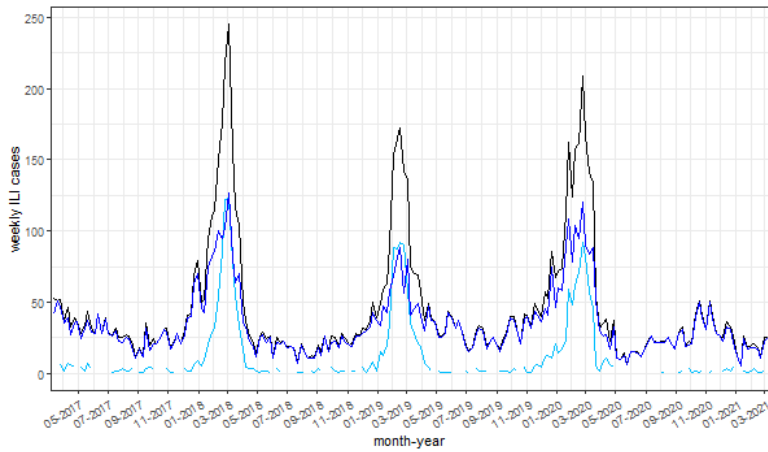

Supplemental Figure A: ILI cases (black), probable (dark blue), confirmed (light blue)

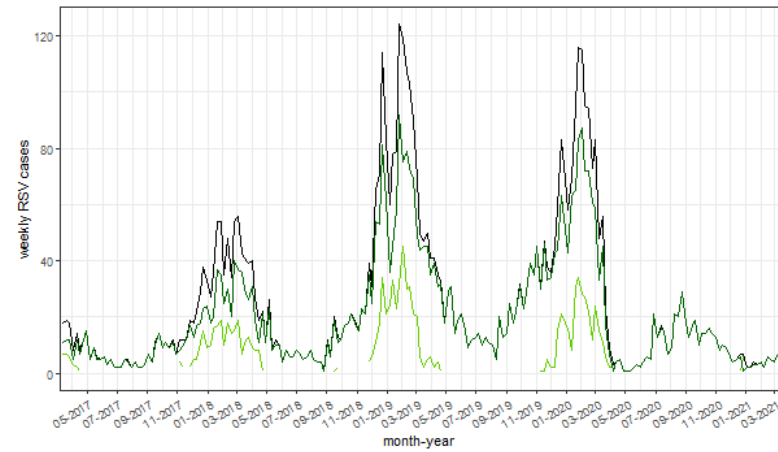

Supplemental Figure 4B: RSV cases (black), probable (dark green), confirmed (light green)

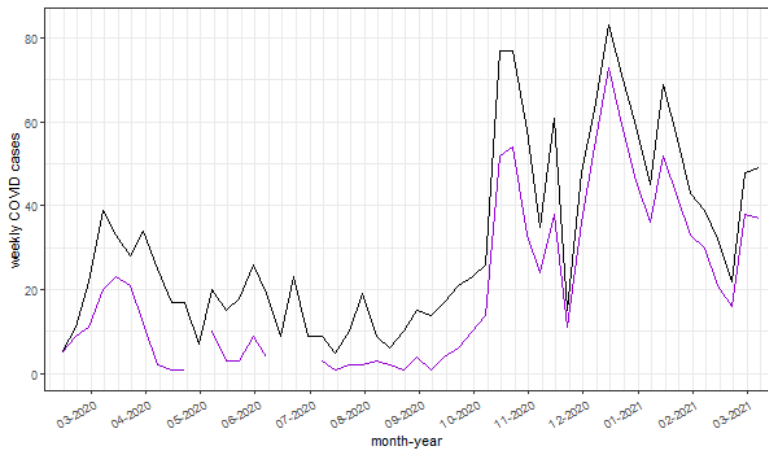

Supplemental Figure 4: COVID-19 cases (black), confirmed (purple)

*Of note: the combined case definition of COVID-19 cases equals the probable case definition.*

**Supplemental Figure 4. Weekly case counts, by probable and possible case classifications as well as the combined case definition, of influenza-like-illness (ILI, 4A), respiratory syncytial virus (RSV, 4B), and COVID-19 (4C), between 6 March 2017 and 13 March 2021.**
