# Supplementary material for: Using routine emergency department data for syndromic surveillance of acute respiratory illness in Germany, week 10-2017 to 10-2021
Source: bioRxiv or medRxiv preprint supplement (doi:10.1101/2021.08.19.21262303), 2022-03-14
Supplement: Supplementary file [file media-1.pdf]

## Supplementary Material

### **“Using routine emergency department data for syndromic surveillance of acute respiratory illness in Germany, week 10-2017 to 10-2021”**

*T. Sonia Boender, Wei Cai, Madlen Schranz, Theresa Kocher, Birte Wagner, Alexander Ullrich, Silke Buda, Rebecca Zöllner, Felix Greiner, Michaela Diercke, Linus Grabenhenrich*

#### **Supplemental Table 1. Case definitions, and case classification (if applicable), used for syndromic surveillance based on routine emergency department data.**

| <b>Case</b>                             | <b>Definition</b>                                                                                                                                                                                                                                                                                                                                                                                                                                                                                                                                                                                                                                                                                                                                                                                                                                                                                                                                                                                                                                                                                                                                                                                                                                                                                   |
|-----------------------------------------|-----------------------------------------------------------------------------------------------------------------------------------------------------------------------------------------------------------------------------------------------------------------------------------------------------------------------------------------------------------------------------------------------------------------------------------------------------------------------------------------------------------------------------------------------------------------------------------------------------------------------------------------------------------------------------------------------------------------------------------------------------------------------------------------------------------------------------------------------------------------------------------------------------------------------------------------------------------------------------------------------------------------------------------------------------------------------------------------------------------------------------------------------------------------------------------------------------------------------------------------------------------------------------------------------------|
| Acute respiratory illness (ARI)         | <ul style="list-style-type: none"> <li>- ICD-10 diagnostic code (any): J00-J22, J44.0, B34.9, U07.1, U07.2</li> <li><b>OR</b></li> <li>- Chief complaint(s):               <ul style="list-style-type: none"> <li>o [MTS: breathing problems<br/><b>AND</b><br/>(elevated temperature/fever <b>OR</b> suspected sepsis <b>OR</b> productive cough <b>OR</b> shortness of breath <b>OR</b> elevated breathing)]</li> <li><b>OR</b></li> <li>o [MTS: sore throat<br/><b>AND</b><br/>(elevated temperature/fever <b>OR</b> suspected sepsis <b>OR</b> special risk of infection <b>OR</b> known or suspected immunosuppression <b>OR</b> travel i.e. report on recent stay abroad <b>OR</b> special risk of infection <b>OR</b> airway at risk <b>OR</b> short of breathing <b>OR</b> light/medium/strong pain <b>OR</b> unresponsive child <b>OR</b> rapid onset <b>OR</b> shock <b>OR</b> hypersalivation <b>OR</b> stridor <b>OR</b> drowsy i.e. altered level of consciousness)]</li> <li><b>OR</b></li> <li>o [MTS: asthma<br/><b>AND</b><br/>(elevated temperature/fever <b>OR</b> suspected sepsis)]</li> <li><b>OR</b></li> <li>o [MTS: feeling unwell <b>AND</b> insufficient breathing]</li> <li><b>OR</b></li> <li>o [CEDIS-PCL (any): 661, 154, 653, 651, 103, 104]</li> </ul> </li> </ul> |
| Severe acute respiratory illness (SARI) | <ul style="list-style-type: none"> <li>- ICD-10 diagnostic code (any): J09-J22, U07.1, U07.2</li> <li><b>AND</b></li> <li>- Disposition:               <ul style="list-style-type: none"> <li>o [Inpatient admission: internal transfer, operational unit, monitoring unit, regular ward<br/><b>OR</b></li> <li>o External transfer]</li> </ul> </li> </ul>                                                                                                                                                                                                                                                                                                                                                                                                                                                                                                                                                                                                                                                                                                                                                                                                                                                                                                                                         |

Supplemental Table 1. continued.

|                                     |                                                                                                                                                                                                                                                                                                                                                                                                                                                                                                                                                                                                                                                                                                                                                                                                                                                                                                                                                                                                                                                                                                                                                                                                                                                                                                                                                                                                                                                                                                                                                                                                                                                                                                                                                                                                                                                             |
|-------------------------------------|-------------------------------------------------------------------------------------------------------------------------------------------------------------------------------------------------------------------------------------------------------------------------------------------------------------------------------------------------------------------------------------------------------------------------------------------------------------------------------------------------------------------------------------------------------------------------------------------------------------------------------------------------------------------------------------------------------------------------------------------------------------------------------------------------------------------------------------------------------------------------------------------------------------------------------------------------------------------------------------------------------------------------------------------------------------------------------------------------------------------------------------------------------------------------------------------------------------------------------------------------------------------------------------------------------------------------------------------------------------------------------------------------------------------------------------------------------------------------------------------------------------------------------------------------------------------------------------------------------------------------------------------------------------------------------------------------------------------------------------------------------------------------------------------------------------------------------------------------------------|
| Influenza-like illness (ILI)        | <p>PROBABLE CASE</p> <ul style="list-style-type: none"> <li>- ICD-10 diagnostic code (any): J06.-, J12.8, J12.9, J18.-, J22</li> </ul> <p><b>OR</b></p> <ul style="list-style-type: none"> <li>- Chief complaint(s): <ul style="list-style-type: none"> <li>o [MTS: breathing problems</li> </ul> <p><b>AND</b><br/>(elevated temperature/fever <b>OR</b> suspected sepsis <b>OR</b> productive cough <b>OR</b> shortness of breath <b>OR</b> elevated breathing)]</p> <p><b>OR</b></p> <li>o [MTS: sore throat</li> </li></ul> <p><b>AND</b><br/>(elevated temperature/fever <b>OR</b> suspected sepsis <b>OR</b> special risk of infection <b>OR</b> known or suspected immunosuppression <b>OR</b> travel i.e. report on recent stay abroad <b>OR</b> special risk of infection <b>OR</b> airway at risk <b>OR</b> short of breathing <b>OR</b> light/medium/strong pain <b>OR</b> unresponsive child <b>OR</b> rapid onset <b>OR</b> shock <b>OR</b> hypersalivation <b>OR</b> stridor <b>OR</b> drowsy i.e. altered level of consciousness)]</p> <p><b>OR</b></p> <li>o [MTS: asthma</li> <p><b>AND</b><br/>(elevated temperature/fever <b>OR</b> suspected sepsis)]</p> <p><b>OR</b></p> <li>o [MTS: feeling unwell <b>AND</b> insufficient breathing]</li> <li>o [CEDIS-PCL (any): 661, 154, 653, 651, 103, 104]</li> <p><b>AND</b></p> <ul style="list-style-type: none"> <li>- Fever: <ul style="list-style-type: none"> <li>o Temperature <math>\geq 38</math> °C</li> </ul> <p><b>OR</b></p> <li>o Chief complaint: <ul style="list-style-type: none"> <li>▪ MTS: fever</li> </ul> <p><b>OR</b></p> <li>▪ CEDIS-PCL: 852</li> </li></li></ul> <p><b>OR</b></p> <li>o [ICD-10 diagnostic code (any): R50.8, R50.9]</li> <p>CONFIRMED CASE</p> <ul style="list-style-type: none"> <li>- ICD-10 diagnostic code (any): J09, J10.-, J11.-</li> </ul> |
| Respiratory syncytial virus (RSV) – | <p>PROBABLE CASE</p> <ul style="list-style-type: none"> <li>- ICD-10 diagnostic code (any): J12.8, J12.9, J18.-, J20.8, J20.9, J21.8, J21.9, J22</li> </ul> <p><b>AND</b></p> <ul style="list-style-type: none"> <li>- Age <math>\leq 2</math> years</li> </ul> <p>CONFIRMED CASE</p> <ul style="list-style-type: none"> <li>- ICD-10 diagnostic code (any): J12.1, J20.5, J21.0, B97.4</li> </ul>                                                                                                                                                                                                                                                                                                                                                                                                                                                                                                                                                                                                                                                                                                                                                                                                                                                                                                                                                                                                                                                                                                                                                                                                                                                                                                                                                                                                                                                          |
| Coronavirus disease 2019 (COVID-19) | <p>PROBABLE CASE</p> <ul style="list-style-type: none"> <li>- ICD-10 diagnostic code (any): U07.1, U07.2</li> </ul> <p>CONFIRMED CASE</p> <ul style="list-style-type: none"> <li>- ICD-10 diagnostic code: U07.1</li> </ul>                                                                                                                                                                                                                                                                                                                                                                                                                                                                                                                                                                                                                                                                                                                                                                                                                                                                                                                                                                                                                                                                                                                                                                                                                                                                                                                                                                                                                                                                                                                                                                                                                                 |

**Supplemental Table 2. Age and sex of emergency attendees over time, broken down by subsequent pandemic phases.**

|                    | ≤W09/2020<br>(N=1082850) | W10/2020-W20/2020<br>(N=55212) | W21/2020-W30/2020<br>(N=59462) | W31/2020-W39/2020<br>(N=55697) | ≥W40/2020<br>(N=119737) | Overall<br>(N=1372958) |
|--------------------|--------------------------|--------------------------------|--------------------------------|--------------------------------|-------------------------|------------------------|
| <b>Age (years)</b> |                          |                                |                                |                                |                         |                        |
| 0-2                | 56356 (5.2%)             | 3822 (6.9%)                    | 3767 (6.3%)                    | 3482 (6.3%)                    | 7611 (6.4%)             | 75038 (5.5%)           |
| 3-4                | 40817 (3.8%)             | 1591 (2.9%)                    | 1483 (2.5%)                    | 1428 (2.6%)                    | 2707 (2.3%)             | 48026 (3.5%)           |
| 5-9                | 56330 (5.2%)             | 2239 (4.1%)                    | 2654 (4.5%)                    | 2467 (4.4%)                    | 4119 (3.4%)             | 67809 (4.9%)           |
| 10-14              | 43080 (4.0%)             | 1662 (3.0%)                    | 1979 (3.3%)                    | 2072 (3.7%)                    | 3670 (3.1%)             | 52463 (3.8%)           |
| 15-19              | 49574 (4.6%)             | 2073 (3.8%)                    | 2301 (3.9%)                    | 2516 (4.5%)                    | 4690 (3.9%)             | 61154 (4.5%)           |
| 20-39              | 183765 (17.0%)           | 9008 (16.3%)                   | 9912 (16.7%)                   | 9392 (16.9%)                   | 19068 (15.9%)           | 231145 (16.8%)         |
| 40-59              | 269240 (24.9%)           | 14393 (26.1%)                  | 15604 (26.2%)                  | 14160 (25.4%)                  | 30939 (25.8%)           | 344336 (25.1%)         |
| 60-79              | 227639 (21.0%)           | 12393 (22.4%)                  | 13276 (22.3%)                  | 11984 (21.5%)                  | 27658 (23.1%)           | 292950 (21.3%)         |
| 80+                | 156049 (14.4%)           | 8031 (14.5%)                   | 8486 (14.3%)                   | 8196 (14.7%)                   | 19275 (16.1%)           | 200037 (14.6%)         |
| <b>Sex</b>         |                          |                                |                                |                                |                         |                        |
| female             | 524790 (48.5%)           | 26482 (48.0%)                  | 28608 (48.1%)                  | 26792 (48.1%)                  | 58279 (48.7%)           | 664951 (48.4%)         |
| male               | 557971 (51.5%)           | 28728 (52.0%)                  | 30851 (51.9%)                  | 28902 (51.9%)                  | 61456 (51.3%)           | 707908 (51.6%)         |
| other              | 89 (0.0%)                | 2 (0.0%)                       | 3 (0.0%)                       | 3 (0.0%)                       | 2 (0.0%)                | 99 (0.0%)              |

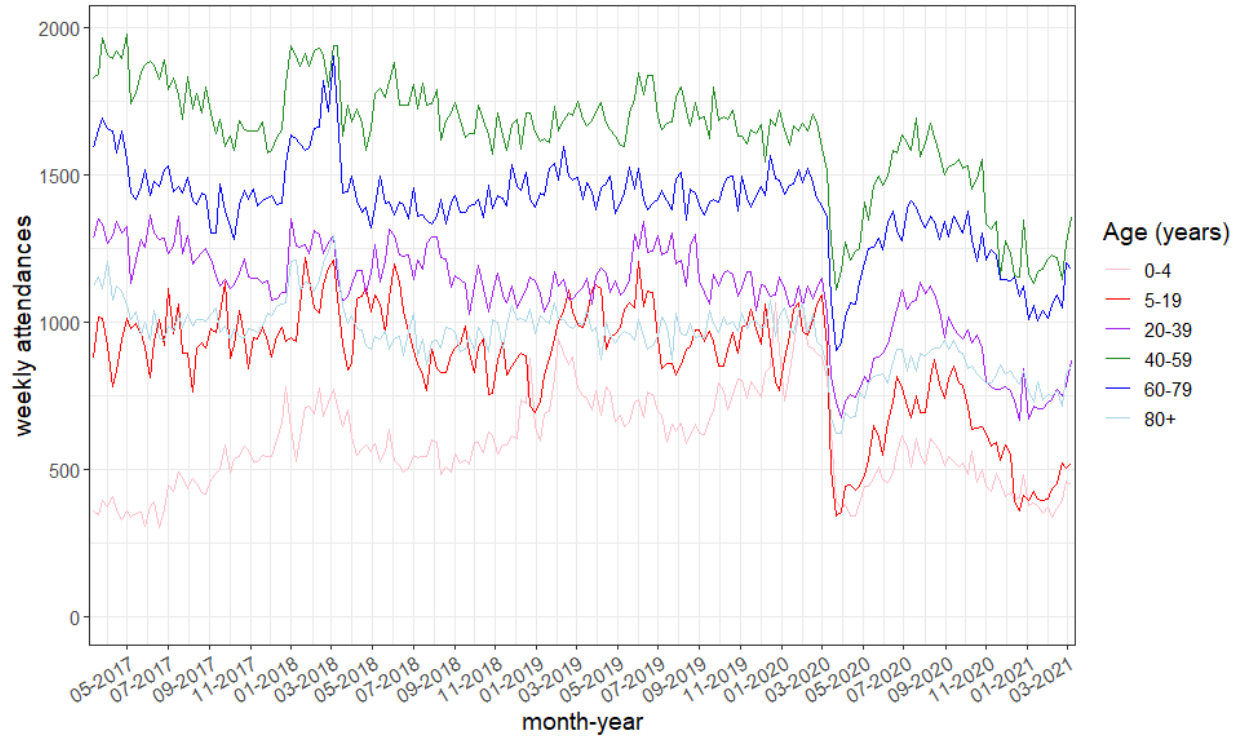

**Supplemental Figure 1. Weekly emergency department attendances, by age group.**

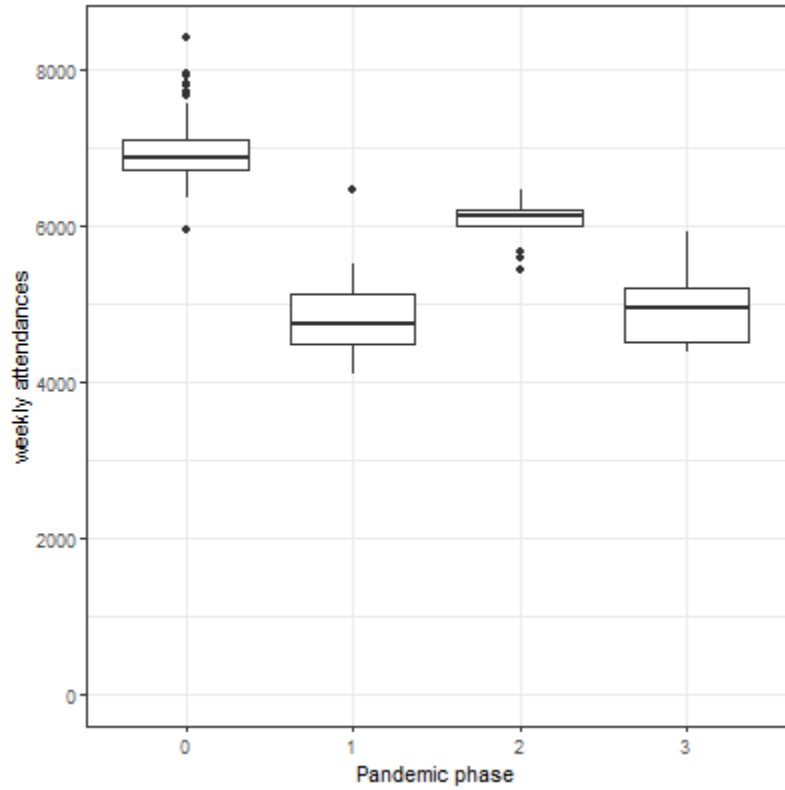

**Supplemental Figure 2. Weekly emergency department attendances, a) before and during the pandemic, broken down by subsequent pandemic phases.**

All comparisons: Wilcoxon rank sum  $P < .001$

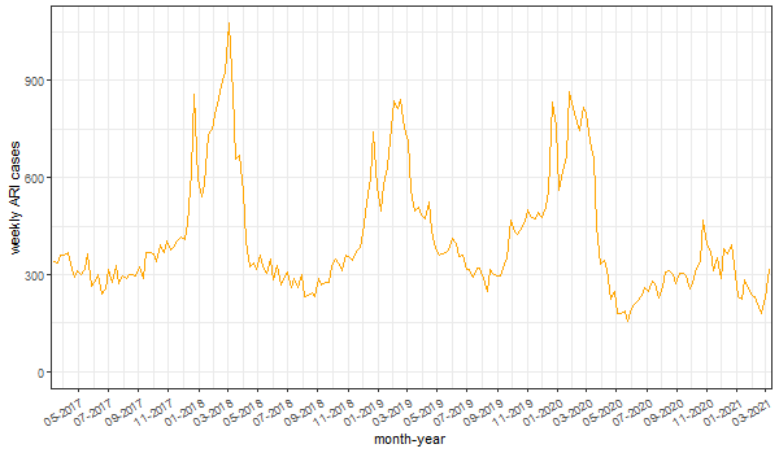

Supplemental Figure 3A

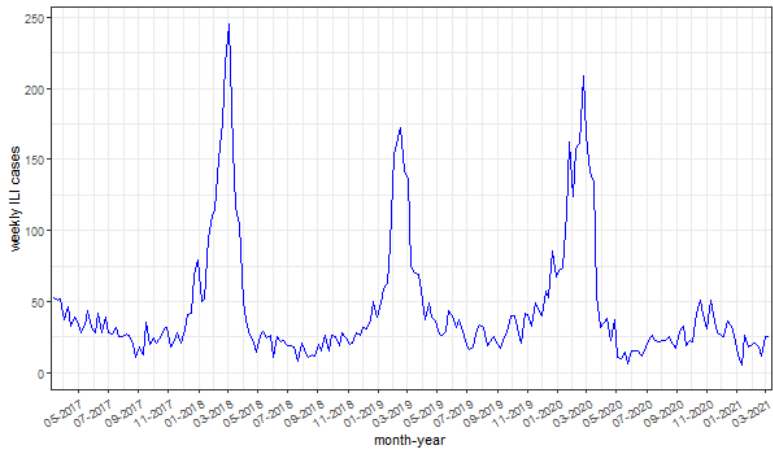

Supplemental Figure 3C

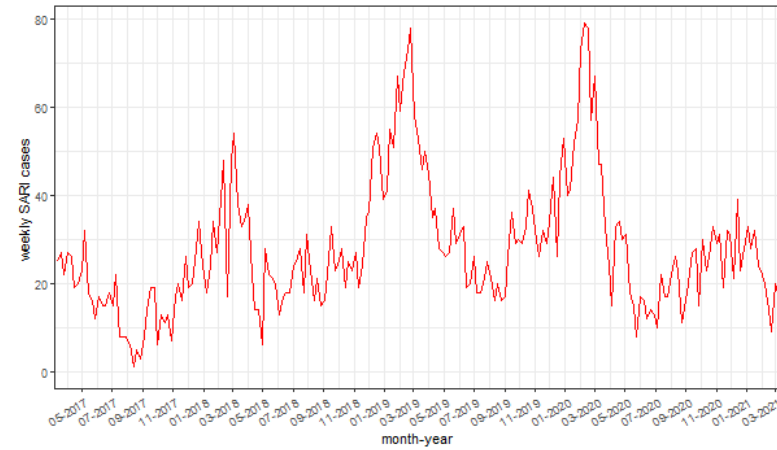

Supplemental Figure 3B

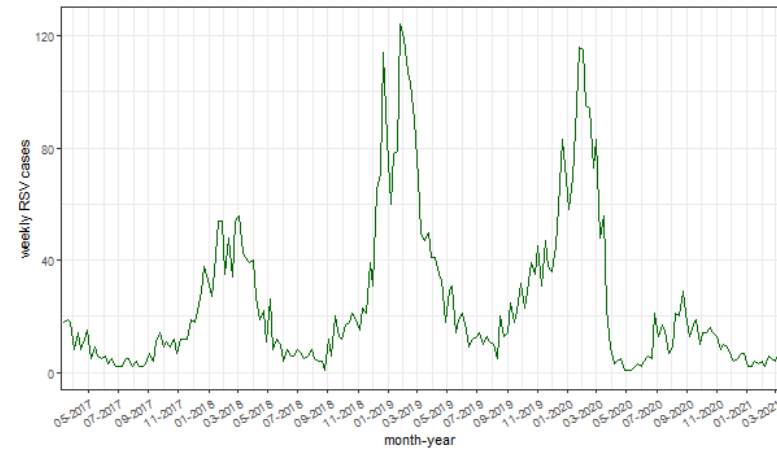

Supplemental Figure 3D

**Supplemental Figure 3. Weekly case count of acute respiratory illness (ARI; 3A), severe acute respiratory illness (SARI; 3B), influenza-like-illness (ILI; 3C), and respiratory syncytial virus (RSV; 3D), between 6 March 2017 and 13 March 2021.**

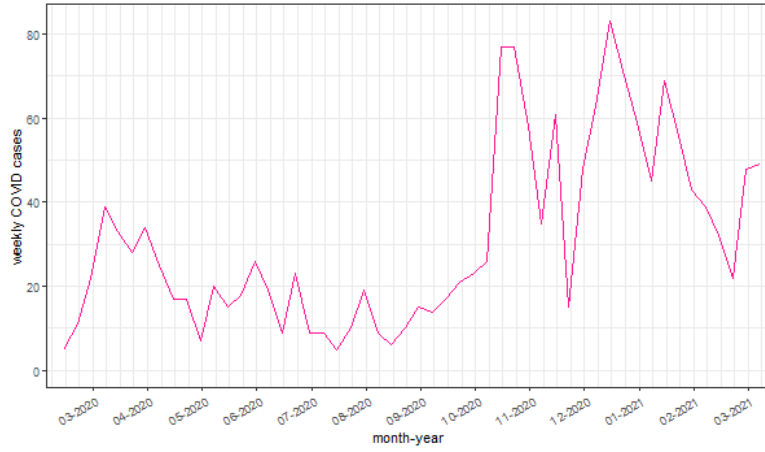

**Supplemental Figure 4. Weekly case count of COVID-19, between 6 March 2020 and including 13 March 2021.**

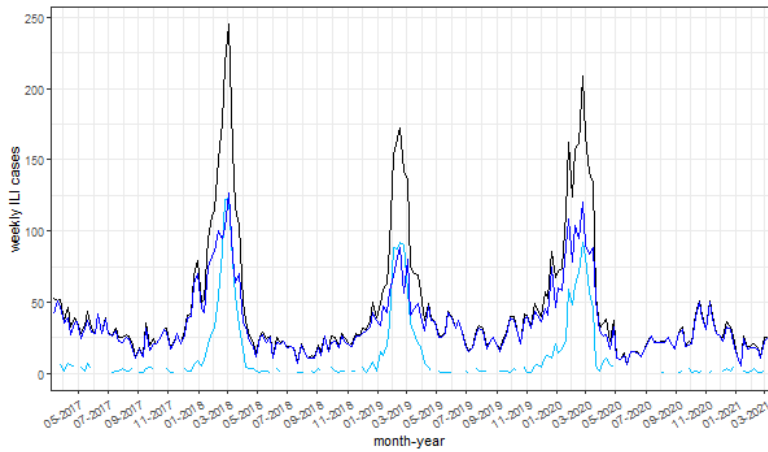

Supplemental Figure 5A: ILI cases (black), probable (dark blue), confirmed (light blue)

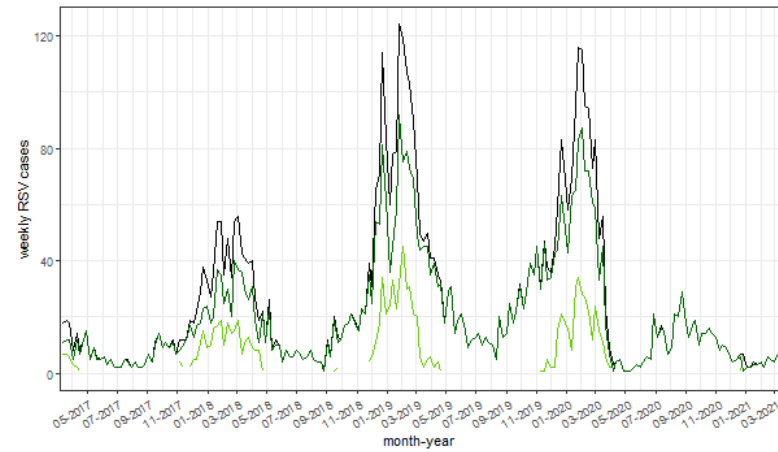

Supplemental Figure 5B: RSV cases (black), probable (dark green), confirmed (light green)

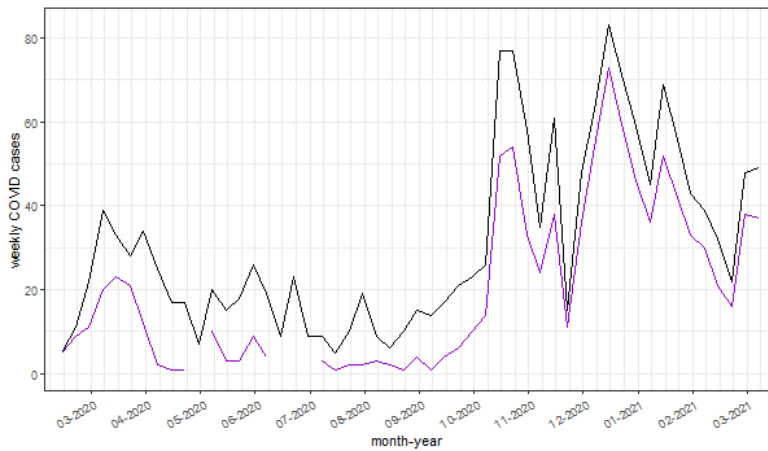

Supplemental Figure 5C: COVID-19 cases (black), confirmed (purple)

*The combined case definition of COVID-19 cases equals the probable case definition.*

**Supplemental Figure 5. Weekly case counts, by probable and possible case classifications as well as the combined case definition, of influenza-like-illness (ILI, 5A), respiratory syncytial virus (RSV, 5B), and COVID-19 (5C), between 6 March 2017 and 13 March 2021.**
